# Supplementary material for: Synthesis of gem-dibromo 1,3-oxazines by NBS-mediated electrophilic cyclization of propargylic amides
Source: Royal Society of Chemistry journal article supplement (doi:10.1039/d3ob00623a), 2023-01-01

# Supplementary Information

## Synthesis of *Gem*-Dibromo 1,3-Oxazines by NBS-Mediated Electrophilic Cyclization of Propargylic Amides

Huaxin Zhang<sup>a</sup>, Yongge Xiong<sup>a</sup>, Jiang Bai<sup>a</sup>, Ruchun Yang<sup>\*a</sup>, Xian-Rong Song<sup>a</sup> and  
Qiang Xiao<sup>\*a</sup>

---

<sup>a</sup> Key Laboratory of Organic Chemistry of Jiangxi Province, Jiangxi Science & Technology Normal University, Nanchang, 330013, China. E-mail: [ouyangruchun@163.com](mailto:ouyangruchun@163.com); E-mail: [xiaoqiang@tsinghua.org.cn](mailto:xiaoqiang@tsinghua.org.cn).

### List of Contents

1. Crystal analysis of compound 2x
2. General Experimental Procedure
3. Analytical data
4. <sup>1</sup>H NMR and <sup>13</sup>C NMR Spectra

## 1. Crystal analysis of compound 2x

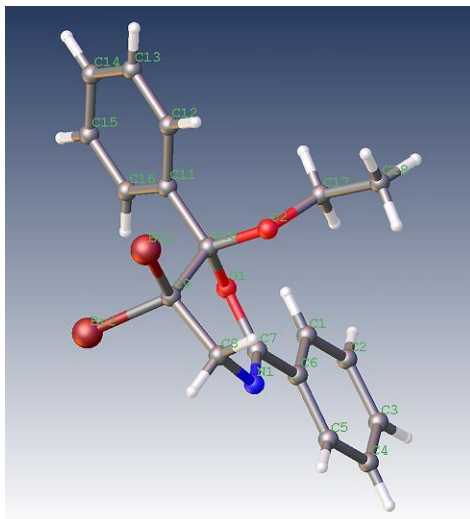

### Datablock: 1

---

|                              |                  |                     |              |
|------------------------------|------------------|---------------------|--------------|
| Bond precision:              | C-C = 0.0069 Å   | Wavelength=0.71073  |              |
| Cell:                        | a=8.4782 (13)    | b=14.044 (2)        | c=14.818 (2) |
|                              | alpha=90         | beta=90             | gamma=90     |
| Temperature:                 | 296 K            |                     |              |
|                              | Calculated       | Reported            |              |
| Volume                       | 1764.4 (4)       | 1764.3 (5)          |              |
| Space group                  | P 21 21 21       | P 21 21 21          |              |
| Hall group                   | P 2ac 2ab        | P 2ac 2ab           |              |
| Moiety formula               | C18 H17 Br2 N O2 | ?                   |              |
| Sum formula                  | C18 H17 Br2 N O2 | C18 H17 Br2 N O2    |              |
| Mr                           | 439.13           | 439.15              |              |
| Dx, g cm <sup>-3</sup>       | 1.653            | 1.653               |              |
| Z                            | 4                | 4                   |              |
| Mu (mm <sup>-1</sup> )       | 4.603            | 4.603               |              |
| F000                         | 872.0            | 872.0               |              |
| F000'                        | 870.11           |                     |              |
| h, k, lmax                   | 10, 16, 17       | 10, 16, 17          |              |
| Nref                         | 3100 [ 1791]     | 3085                |              |
| Tmin, Tmax                   | 0.314, 0.363     |                     |              |
| Tmin'                        | 0.291            |                     |              |
| Correction method= Not given |                  |                     |              |
| Data completeness=           | 1.72/1.00        | Theta (max)= 24.995 |              |
| R(reflections)=              | 0.0302 ( 2597)   | wR2 (reflections)=  |              |
| S =                          | 0.919            | 0.0629 ( 3085)      |              |
|                              | Npar= 209        |                     |              |

## 2. Typical Experimental Procedure

### 2.1 General

All reagents were purchased from commercial sources and used without further treatment, unless otherwise indicated. Methonal (CH<sub>3</sub>OH) was purchased from Adamas Company, safedry, water<50ppm. <sup>1</sup>H and <sup>13</sup>C NMR spectra were recorded on Bruker 400 MHz spectrometers, chemical shifts are given in parts per million (ppm) relative to standard tetramethylsilane (0.00 ppm for <sup>1</sup> H NMR) or residual solvent peaks for <sup>13</sup> C NMR. Data collection for X-ray crystal analysis was performed on a Bruker Smart APEX-II single-crystal X-ray diffractometer using graphite monochromated Mo-K $\alpha$  radiation ( $\lambda = 0.71073 \text{ \AA}$ ) at 296 K. HRMS was obtained using a Q-TOF instrument equipped with ESI source. Standard column chromatography was performed on 200-300 mesh silica gel. using flash column chromatography techniques.

### 2.2 General procedure for the electrophilic cyclization reaction

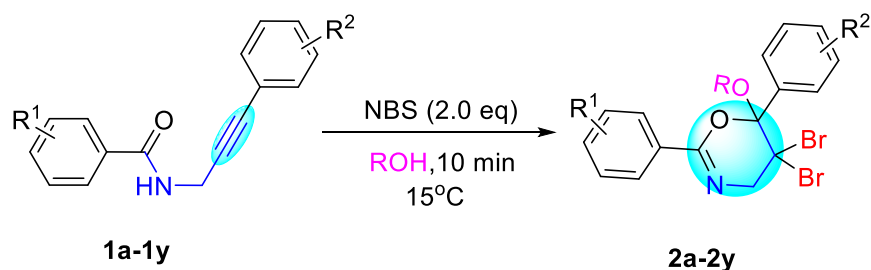

2mL of ROH was added to a flask, then **1a-1y** (0.2 mmol) were added and the reaction was cooled to 15 °C by a magnetic refrigerator. Then NBS (70.8 mg, 0.4

mmol) was added into the resulting mixture in one pot and stirred at 15 °C for 10 min. The progress of the reaction was monitored by TLC. After completion of the reaction, quench the reaction mixture with water and use CH<sub>2</sub>Cl<sub>2</sub> (3 × 5mL) extraction. The combined organic layer was dried over anhydrous Na<sub>2</sub>SO<sub>4</sub> and concentrated under reduced pressure. The crude product was purified by column chromatography on silica gel to give the corresponding product **2a–2y**.

### 2.3 General procedure for gram scale reaction

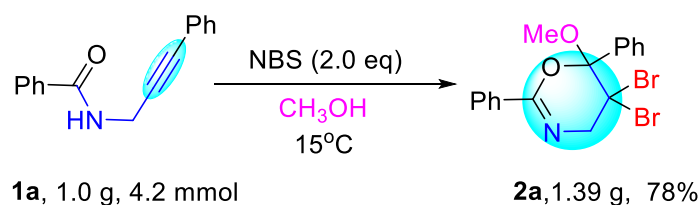

30 mL of CH<sub>3</sub>OH was added to a flask, then **1a** (4.2 mmol) were added and the reaction was cooled to 15 °C by a magnetic refrigerator. Then NBS (1.49 g, 8.4 mmol) was added into the resulting mixture in one pot and stirred at 15 °C for 10 min. The progress of the reaction was monitored by TLC. After completion of the reaction, quench the reaction mixture with water and use CH<sub>2</sub>Cl<sub>2</sub> (3 × 50 mL) extraction. The combined organic layer was dried over anhydrous Na<sub>2</sub>SO<sub>4</sub> and concentrated under reduced pressure. The crude product was purified by column chromatography on silica gel to give the corresponding product **2a**.

### 2.4 General procedure for the synthesis of 2a'

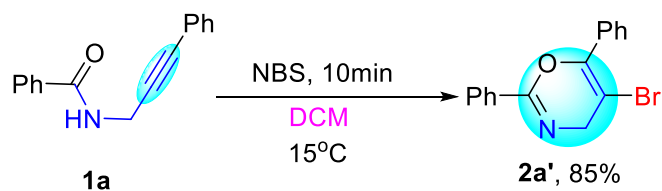

2 mL of  $\text{CH}_2\text{Cl}_2$  was added to a flask, then **1a** (0.2 mmol) was added and the reaction was cooled to 15 °C by a magnetic refrigerator. Then NBS (70.8 mg, 0.4 mmol) was added into the resulting mixture in one pot and stirred at 15 °C for 10 min. The progress of the reaction was monitored by TLC. After completion of the reaction, quench the reaction mixture with water and use  $\text{CH}_2\text{Cl}_2$  ( $3 \times 5\text{mL}$ ) extraction. The combined organic layer was dried over anhydrous  $\text{Na}_2\text{SO}_4$  and concentrated under reduced pressure. The crude product was purified by column chromatography on silica gel to give the corresponding product **2a'**.

### 3. Analytical data

#### 5,5-dibromo-6-methoxy-2,6-diphenyl-5,6-dihydro-4H-1,3-oxazine (2a)

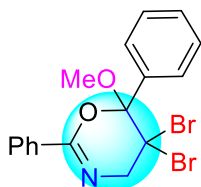

79% yield, 66.8 mg (0.2 mmol scale), white solid, mp 105-108 °C;

$^1\text{H NMR}$  (400 MHz,  $\text{CDCl}_3$ )  $\delta$  8.09 (d,  $J = 7.2$  Hz, 2H), 7.86 (dd,  $J = 6.7, 3.0$  Hz, 2H), 7.62 – 7.39 (m, 6H), 4.91 (d,  $J = 17.9$  Hz, 1H),

4.46 (d,  $J = 17.9$  Hz, 1H), 3.31 (s, 3H).  $^{13}\text{C NMR}$  (101 MHz,  $\text{CDCl}_3$ )  $\delta$  151.7, 133.0,

132.0, 131.3, 130.2, 129.8, 128.4, 127.4, 127.3, 101.7, 65.0, 60.6, 52.6. **HRMS**

(ESI):  $m/z$   $[\text{M}+\text{H}]^+$  calcd for  $\text{C}_{17}\text{H}_{15}\text{Br}_2\text{NO}_2$ : 423.9542; found: 423.9547.

#### 5,5-dibromo-6-methoxy-2-phenyl-6-(p-tolyl)-5,6-dihydro-4H-1,3-oxazine (2b)

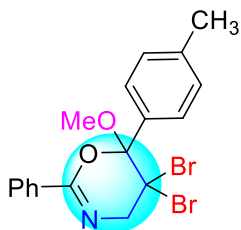

83% yield, 72.5 mg (0.2 mmol scale), white solid, mp 116-118

°C;  $^1\text{H NMR}$  (400 MHz,  $\text{CDCl}_3$ )  $\delta$  8.16 – 8.04 (m, 2H), 7.75 (d,

$J = 8.2$  Hz, 2H), 7.56 – 7.43 (m, 3H), 7.32 (d,  $J = 8.0$  Hz, 2H),

4.92 (d,  $J = 17.9$  Hz, 1H), 4.47 (d,  $J = 17.9$  Hz, 1H), 3.31 (s, 3H), 2.46 (s, 3H);  $^{13}\text{C}$

**NMR** (101 MHz,  $\text{CDCl}_3$ )  $\delta$  151.8, 139.7, 132.0, 131.2, 130.1, 128.4, 128.2, 127.2,

101.8, 65.4, 60.6, 52.5, 21.3; **HRMS** (ESI):  $m/z$   $[\text{M}+\text{H}]^+$  calcd for  $\text{C}_{18}\text{H}_{17}\text{Br}_2\text{NO}_2$ :

437.9699; found: 4337.9686.

#### 5,5-dibromo-6-methoxy-6-(4-methoxyphenyl)-2-phenyl-5,6-dihydro-4H-1,3-oxazine (2c)

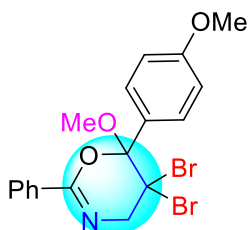

82% yield, 74.3 mg (0.2 mmol scale), white solid, mp

120-122 °C;  $^1\text{H NMR}$  (400 MHz,  $\text{CDCl}_3$ )  $\delta$  8.07 (d,  $J = 7.2$

Hz, 2H), 7.76 (d,  $J = 8.8$  Hz, 2H), 7.56 – 7.41 (m, 3H), 7.01 (d,  $J = 8.8$  Hz, 2H), 4.88 (d,  $J = 17.9$  Hz, 1H), 4.45 (d,  $J = 17.9$  Hz, 1H), 3.88 (s, 3H), 3.30 (s, 3H);  $^{13}\text{C}$  NMR (101 MHz,  $\text{CDCl}_3$ )  $\delta$  160.6, 151.8, 132.0, 131.5, 131.3, 128.4, 127.2, 125.0, 112.8, 101.8, 66.0, 60.6, 55.3, 52.5; HRMS (ESI):  $m/z$   $[\text{M}+\text{H}]^+$  calcd for  $\text{C}_{18}\text{H}_{17}\text{Br}_2\text{NO}_3$ : 453.9648; found: 453.9642.

**5,5-dibromo-6-(4-chlorophenyl)-6-methoxy-2-phenyl-5,6-dihydro-4H-1,3-oxazine**  
**e(2d)**

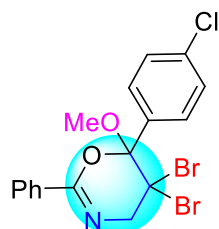

69% yield, 63.1 mg (0.2 mmol scale), white solid, mp 121-122 °C;  $^1\text{H}$  NMR (400 MHz,  $\text{CDCl}_3$ )  $\delta$  8.04 (d,  $J = 7.2$  Hz, 2H), 7.78 (d,  $J = 8.6$  Hz, 2H), 7.62 – 7.32 (m, 5H), 4.87 (d,  $J = 17.9$  Hz, 1H), 4.44 (d,  $J = 17.9$  Hz, 1H), 3.29 (s, 3H);  $^{13}\text{C}$  NMR (101 MHz,  $\text{CDCl}_3$ )  $\delta$  151.4, 136.1, 131.8, 131.6, 131.4, 128.5, 127.8, 127.2, 101.4, 64.5, 60.4, 52.7; HRMS (ESI):  $m/z$   $[\text{M}+\text{H}]^+$  calcd for  $\text{C}_{17}\text{H}_{14}\text{Br}_2\text{ClNO}_2$ : 457.9153; found: 457.9148.

**5,5-dibromo-6-(4-fluorophenyl)-6-methoxy-2-phenyl-5,6-dihydro-4H-1,3-oxazine**  
**e(2e)**

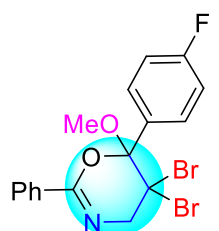

78% yield, 68.8 mg (0.2 mmol scale), white solid, mp 135-137 °C;  $^1\text{H}$  NMR (400 MHz,  $\text{CDCl}_3$ )  $\delta$  8.05 (d,  $J = 7.3$  Hz, 2H), 7.90 – 7.77 (m, 2H), 7.56 – 7.39 (m, 3H), 7.18 (t,  $J = 8.7$  Hz, 2H), 4.88 (d,  $J = 17.9$  Hz, 1H), 4.44 (d,  $J = 17.9$  Hz, 1H), 3.29 (s, 3H).  $^{13}\text{C}$  NMR (101 MHz,  $\text{CDCl}_3$ )  $\delta$  163.6 (d,  $J = 248.0$  Hz), 151.6, 132.2 (d,  $J = 9.0$  Hz), 132.3, 131.8, 131.4,

128.9, 128.5, 127.2, 114.5 (d,  $J = 21.0$  Hz), 101.4, 65.0, 60.5, 52.6;  $^{19}\text{F}$  NMR (376 MHz,  $\text{CDCl}_3$ )  $\delta$  -111.50.

HRMS (ESI):  $m/z$   $[\text{M}+\text{H}]^+$  calcd for  $\text{C}_{17}\text{H}_{14}\text{Br}_2\text{FNO}_2$ : 441.9448; found: 441.9454.

**5,5-dibromo-6-(4-(tert-butyl)phenyl)-6-methoxy-2-phenyl-5,6-dihydro-4H-1,3-oxazine(2f)**

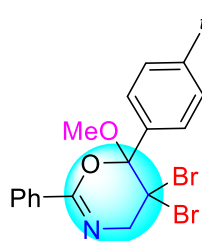

67% yield, 64.2 mg (0.2 mmol scale), white solid, mp 107-109 °C;  $^1\text{H}$  NMR (400 MHz,  $\text{CDCl}_3$ )  $\delta$  8.23 – 8.00 (m, 2H), 7.75 (d,  $J = 8.5$  Hz, 2H), 7.60 – 7.34 (m, 5H), 4.90 (d,  $J = 17.9$  Hz, 1H), 4.45 (d,  $J = 17.9$  Hz, 1H), 3.30 (s, 3H), 1.39 (s, 9H);  $^{13}\text{C}$  NMR (101 MHz,  $\text{CDCl}_3$ )  $\delta$  152.7, 151.8, 132.0, 131.2, 129.9, 128.4, 127.3, 124.4, 101.8, 65.4, 60.7, 52.6, 34.7, 31.3; HRMS (ESI):  $m/z$   $[\text{M}+\text{H}]^+$  calcd for  $\text{C}_{21}\text{H}_{23}\text{Br}_2\text{NO}_2$ : 480.0168; found: 480.0168.

**Ethyl-4-(5,5-dibromo-6-methoxy-2-phenyl-5,6-dihydro-4H-1,3-oxazin-6-yl)benzoate(2g)**

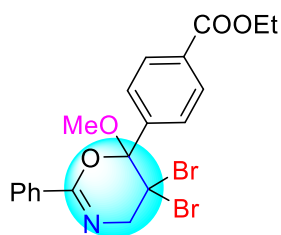

45% yield, 44.6 mg (0.2 mmol scale), white solid, mp 111-112 °C;  $^1\text{H}$  NMR (400 MHz,  $\text{CDCl}_3$ )  $\delta$  8.17 (d,  $J = 8.5$  Hz, 2H), 8.09 – 8.02 (m, 2H), 7.92 (d,  $J = 8.5$  Hz, 2H), 7.57 – 7.41 (m, 3H), 4.89 (d,  $J = 17.9$  Hz, 1H), 4.55 – 4.37 (m, 3H), 3.29 (s, 3H), 1.42 (t,  $J = 7.1$  Hz, 3H);  $^{13}\text{C}$  NMR (101 MHz,  $\text{CDCl}_3$ )  $\delta$  166.1, 151.4, 137.6, 131.8 $\times$ 2, 131.4, 130.3, 128.6, 128.5, 127.3, 101.6, 63.9, 61.2, 60.4, 52.8, 14.5. HRMS (ESI):  $m/z$



[M+H]<sup>+</sup> calcd for C<sub>20</sub>H<sub>19</sub>Br<sub>2</sub>NO<sub>3</sub>: 495.9754; found: 495.9750.

**5,5-dibromo-6-(3-chlorophenyl)-6-methoxy-2-phenyl-5,6-dihydro-4H-1,3-oxazine**

**e (2h)**

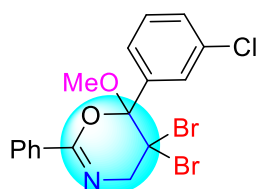

68% yield, 62.2 mg (0.2 mmol scale), white solid, mp 115-117 °C; <sup>1</sup>H NMR (400 MHz, CDCl<sub>3</sub>) δ 8.10 – 8.01 (m, 2H), 7.83 (t, *J* = 1.7 Hz, 1H), 7.77 – 7.71 (m, 1H), 7.56 – 7.40 (m, 5H), 4.88 (d, *J* = 17.9 Hz, 1H), 4.44 (d, *J* = 17.9 Hz, 1H), 3.30 (s, 3H); <sup>13</sup>C NMR (101 MHz, CDCl<sub>3</sub>) δ 151.4, 135.2, 133.7, 131.7, 131.4, 130.3, 130.0, 128.7, 128.5, 128.4, 127.3, 101.1, 64.1, 60.5, 52.8; HRMS (ESI): *m/z* [M+H]<sup>+</sup> calcd for C<sub>17</sub>H<sub>14</sub>Br<sub>2</sub>ClNO<sub>2</sub>: 457.9153; found: 457.9147.

**5,5-dibromo-6-methoxy-2-phenyl-6-(*m*-tolyl)-5,6-dihydro-4H-1,3-oxazine (2i)**

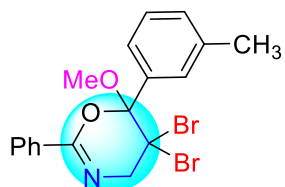

78% yield, 68.2 mg (0.2 mmol scale), white solid, mp 106-108 °C; <sup>1</sup>H NMR (400 MHz, CDCl<sub>3</sub>) δ 8.14 – 8.04 (m, 2H), 7.65 (s, 2H), 7.56 – 7.29 (m, 5H), 4.91 (d, *J* = 17.9 Hz, 1H), 4.46 (d, *J* = 17.9 Hz, 1H), 3.31 (s, 3H), 2.48 (s, 3H); <sup>13</sup>C NMR (101 MHz, CDCl<sub>3</sub>) δ 151.8, 137.1, 132.8, 132.0, 131.3, 130.7, 130.5, 128.4, 127.3×2, 101.7, 65.0, 60.7, 52.6, 21.7. HRMS (ESI): *m/z* [M+H]<sup>+</sup> calcd for C<sub>18</sub>H<sub>17</sub>Br<sub>2</sub>NO<sub>2</sub>: 437.9699; found: 437.9691.

**5,5-dibromo-6-methoxy-6-(3-methoxyphenyl)-2-phenyl-5,6-dihydro-4H-1,3-oxazine (2j)**

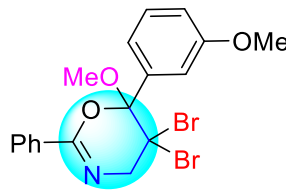

79% yield, 71.6 mg (0.2 mmol scale), white solid, mp 130-132 °C;  $^1\text{H NMR}$  (400 MHz,  $\text{CDCl}_3$ )  $\delta$  8.13 – 8.03 (m, 2H), 7.55 – 7.35 (m, 6H), 7.10 – 7.02 (m, 1H), 4.90 (d,  $J = 17.9$  Hz, 1H), 4.45 (d,  $J = 17.9$  Hz, 1H), 3.88 (s, 3H), 3.31 (s, 3H),  $^{13}\text{C NMR}$  (101 MHz,  $\text{CDCl}_3$ )  $\delta$  158.9, 151.6, 134.6, 131.9, 131.3, 128.4, 127.2, 122.6, 116.4, 114.9, 101.6, 64.7, 60.7, 55.4, 52.6. **HRMS** (ESI):  $m/z$   $[\text{M}+\text{H}]^+$  calcd for  $\text{C}_{18}\text{H}_{17}\text{Br}_2\text{NO}_3$ : 453.9648; found: 453.9645.

**5,5-dibromo-6-methoxy-6-(2-methoxyphenyl)-2-phenyl-5,6-dihydro-4H-1,3-oxazine (2k)**

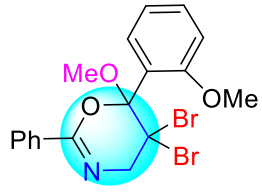

76% yield, 68.9 mg (0.2 mmol scale), white solid, mp 140-142 °C;  $^1\text{H NMR}$  (400 MHz,  $\text{CDCl}_3$ )  $\delta$  8.13 – 8.02 (m, 2H), 7.90 – 7.78 (m, 1H), 7.55 – 7.37 (m, 4H), 7.17 – 6.98 (m, 2H), 4.89 (d,  $J = 17.8$  Hz, 1H), 4.40 (d,  $J = 17.8$  Hz, 1H), 3.90 (s, 3H), 3.39 (s, 3H);  $^{13}\text{C NMR}$  (101 MHz,  $\text{CDCl}_3$ )  $\delta$  158.4, 151.8, 134.1, 132.3, 131.6, 131.1, 128.3, 127.3, 120.2, 119.5, 112.2, 103.0, 64.6, 60.8, 55.4, 52.7; **HRMS** (ESI):  $m/z$   $[\text{M}+\text{H}]^+$  calcd for  $\text{C}_{18}\text{H}_{17}\text{Br}_2\text{NO}_3$ : 453.9648; found: 453.9642.

**5,5-dibromo-6-(3,5-dimethylphenyl)-6-methoxy-2-phenyl-5,6-dihydro-4H-1,3-oxazine (2l)**

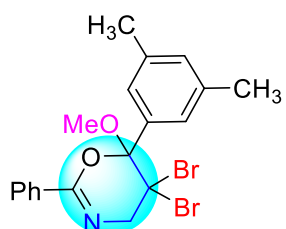

73% yield, 64.7 mg (0.2 mmol scale), white solid, mp 115-117 °C;  $^1\text{H NMR}$  (400 MHz,  $\text{CDCl}_3$ )  $\delta$  8.13 – 7.99 (m,

2H), 7.77 (d,  $J = 7.9$  Hz, 1H), 7.55 – 7.40 (m, 3H), 7.20 – 7.07 (m, 2H), 4.91 (d,  $J = 17.9$  Hz, 1H), 4.46 (d,  $J = 17.9$  Hz, 1H), 3.31 (s, 3H), 2.74 (s, 3H), 2.39 (s, 3H);  $^{13}\text{C}$  NMR (101 MHz,  $\text{CDCl}_3$ )  $\delta$  151.6, 139.6, 133.8, 132.1, 131.3, 128.4, 127.8, 127.4, 125.7, 96.6, 66.0, 61.4, 52.4, 26.9, 21.0; HRMS (ESI):  $m/z$   $[\text{M}+\text{H}]^+$  calcd for  $\text{C}_{19}\text{H}_{19}\text{Br}_2\text{NO}_2$ : 451.9856; found: 451.9848.

**5,5-dibromo-2-(2-fluorophenyl)-6-methoxy-6-phenyl-5,6-dihydro-4H-1,3-oxazine (2m)**

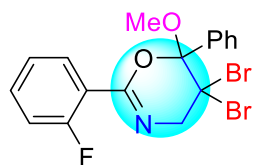

75% yield, 66.2 mg (0.2 mmol scale), white solid, mp 118-120 °C;  $^1\text{H}$  NMR (400 MHz,  $\text{CDCl}_3$ )  $\delta$  7.89 (td,  $J = 7.6, 1.7$  Hz, 1H), 7.82 (dd,  $J = 6.5, 3.0$  Hz, 2H), 7.51 – 7.41 (m, 4H), 7.25 – 7.12 (m, 2H), 4.90 (d,  $J = 17.8$  Hz, 1H), 4.45 (d,  $J = 17.8$  Hz, 1H), 3.35 (s, 3H);  $^{13}\text{C}$  NMR (101 MHz,  $\text{CDCl}_3$ )  $\delta$  160.9 (d,  $J = 254.0$  Hz), 150.8, 132.7, 132.5 (d,  $J = 8.0$  Hz), 130.8, 130.2, 129.7, 127.4, 124.1, 116.8 (d,  $J = 22.0$  Hz), 102.2, 64.6, 60.6, 52.9;  $^{19}\text{F}$  NMR (376 MHz,  $\text{CDCl}_3$ )  $\delta$  -111.31; HRMS (ESI):  $m/z$   $[\text{M}+\text{H}]^+$  calcd for  $\text{C}_{17}\text{H}_{14}\text{Br}_2\text{FNO}_2$ : 441.9448; found: 441.9437.

**5,5-dibromo-2-(2-bromophenyl)-6-methoxy-6-phenyl-5,6-dihydro-4H-1,3-oxazine (2n)**

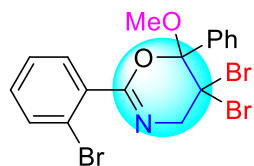

73% yield, 73.1 mg (0.2 mmol scale), white solid, mp 136-138 °C;  $^1\text{H}$  NMR (400 MHz,  $\text{CDCl}_3$ )  $\delta$  7.86 – 7.79 (m, 2H), 7.69 – 7.62 (m, 2H), 7.49 – 7.42 (m, 3H), 7.38 (td,  $J =$

7.5, 1.0 Hz, 1H), 7.34 – 7.27 (m, 1H), 4.90 (d,  $J = 17.6$  Hz, 1H), 4.45 (d,  $J = 17.6$  Hz, 1H), 3.36 (s, 3H);  $^{13}\text{C}$  NMR (101 MHz,  $\text{CDCl}_3$ )  $\delta$  153.1, 134.9, 133.6, 132.6, 131.1, 130.5, 130.3, 129.8, 127.3, 120.9, 102.6, 64.4, 60.4, 53.1; HRMS (ESI):  $m/z$   $[\text{M}+\text{H}]^+$  calcd for  $\text{C}_{17}\text{H}_{14}\text{Br}_3\text{NO}_2$ : 501.8648; found: 501.8655.

### 5,5-dibromo-2-(2-iodophenyl)-6-methoxy-6-phenyl-5,6-dihydro-4H-1,3-oxazine

(2o)

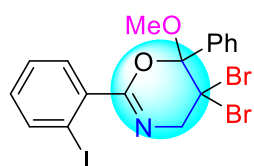

81% yield, 88.9 mg (0.2 mmol scale), white solid, mp

135-136 °C;  $^1\text{H}$  NMR (400 MHz,  $\text{CDCl}_3$ )  $\delta$  7.96 (d,  $J = 7.9$

Hz, 1H), 7.82 (dd,  $J = 7.3, 2.3$  Hz, 2H), 7.61 (dd,  $J = 7.7, 1.4$

Hz, 1H), 7.50 – 7.36 (m, 4H), 7.17 – 7.08 (m, 1H), 4.90 (d,  $J = 17.8$  Hz, 1H), 4.46 (d,

$J = 17.8$  Hz, 1H), 3.37 (s, 3H);  $^{13}\text{C}$  NMR (101 MHz,  $\text{CDCl}_3$ )  $\delta$  153.8, 140.5, 138.3,

132.6, 131.2, 130.3, 129.8, 129.6, 128.0, 127.3, 102.6, 94.2, 64.4, 60.3, 53.2;

HRMS (ESI):  $m/z$   $[\text{M}+\text{H}]^+$  calcd for  $\text{C}_{17}\text{H}_{14}\text{Br}_2\text{INO}_2$ : 549.8509; found: 549.8507.

### 5,5-dibromo-6-methoxy-2-(3-methoxyphenyl)-6-phenyl-5,6-dihydro-4H-1,3-oxazine (2p)

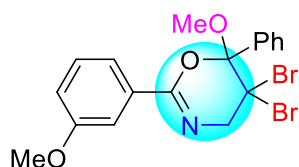

68% yield, 61.6 mg (0.2 mmol scale), white solid, mp

127-129 °C;  $^1\text{H}$  NMR (400 MHz,  $\text{CDCl}_3$ )  $\delta$  7.84 (dd,  $J =$

6.5, 3.3 Hz, 2H), 7.70 – 7.61 (m, 2H), 7.50 (dd,  $J = 5.1, 1.7$

Hz, 3H), 7.36 (t,  $J = 8.0$  Hz, 1H), 7.11 – 7.03 (m, 1H), 4.90 (d,  $J = 17.9$  Hz, 1H),

4.45 (d,  $J = 17.9$  Hz, 1H), 3.87 (s, 3H), 3.30 (s, 3H);  $^{13}\text{C}$  NMR (101 MHz,  $\text{CDCl}_3$ )  $\delta$

159.7, 151.6, 133.3, 132.9, 130.2, 129.8, 129.4, 127.4, 119.6, 117.5, 112.3, 101.7, 64.9, 60.6, 55.4, 52.7. **HRMS** (ESI):  $m/z$   $[M+H]^+$  calcd for  $C_{18}H_{17}Br_2NO_3$ : 453.9648; found: 453.9638.

**5,5-dibromo-6-methoxy-6-phenyl-2-(3-(trifluoromethyl)phenyl)-5,6-dihydro-4H-1,3-oxazine (2q)**

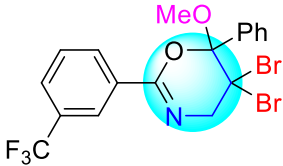 76% yield, 74.6 mg (0.2 mmol scale), white solid, mp 136-137 °C;  **$^1H$  NMR** (400 MHz,  $CDCl_3$ )  $\delta$  8.35 (s, 1H), 8.26 (d,  $J = 7.8$  Hz, 1H), 7.89 – 7.72 (m, 3H), 7.59 (t,  $J = 7.8$  Hz, 1H), 7.56 – 7.48 (m, 3H), 4.92 (d,  $J = 18.0$  Hz, 1H), 4.48 (d,  $J = 18.0$  Hz, 1H), 3.31 (s, 3H);  **$^{13}C$  NMR** (101 MHz,  $CDCl_3$ )  $\delta$  150.6, 132.8, 131.1(q,  $J = 32.0$  Hz), 130.4, 130.1, 129.9, 129.0, 127.8(q,  $J = 3.3$  Hz), 127.6, 124.2 (q,  $J = 3.8$  Hz), 123.8 (q,  $J = 271.0$  Hz), 102.0, 64.4, 60.6, 52.8;  **$^{19}F$  NMR** (376 MHz,  $CDCl_3$ )  $\delta$  -62.63; **HRMS** (ESI):  $m/z$   $[M+H]^+$  calcd for  $C_{18}H_{14}Br_2F_3NO_2$ : 491.9416; found: 491.9421.

**5,5-dibromo-2-(4-chlorophenyl)-6-methoxy-6-phenyl-5,6-dihydro-4H-1,3-oxazine (2r)**

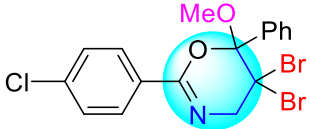 80% yield, 73.1 mg (0.2 mmol scale), white solid, mp 134-135 °C;  **$^1H$  NMR** (400 MHz,  $CDCl_3$ )  $\delta$  8.00 (d,  $J = 8.6$  Hz, 2H), 7.83 (d,  $J = 1.9$  Hz, 2H), 7.50 (dd,  $J = 5.0, 1.7$  Hz, 3H), 7.42 (d,  $J = 8.6$  Hz, 2H), 4.88 (d,  $J = 17.9$  Hz, 1H), 4.43 (d,  $J = 17.9$  Hz, 1H), 3.28 (s, 3H);  **$^{13}C$**

**NMR** (101 MHz, CDCl<sub>3</sub>)  $\delta$  150.9, 137.6, 132.8, 130.4, 130.2, 129.8, 128.7, 128.6, 127.5, 101.8, 64.6, 60.6, 52.7; **HRMS** (ESI):  $m/z$  [M+H]<sup>+</sup> calcd for C<sub>17</sub>H<sub>14</sub>Br<sub>2</sub>ClNO<sub>2</sub>: 457.9153; found: 457.9161.

**5,5-dibromo-6-methoxy-6-phenyl-2-(p-tolyl)-5,6-dihydro-4H-1,3-oxazine (2s)**

81% yield, 70.8 mg (0.2 mmol scale), white solid, mp 120-122 °C; **<sup>1</sup>H NMR** (400 MHz, CDCl<sub>3</sub>)  $\delta$  7.96 (d,  $J$  = 8.1 Hz, 2H), 7.92 – 7.81 (m, 2H), 7.57 – 7.43 (m, 3H), 7.25 (d,  $J$  = 8.0 Hz, 2H), 4.89 (d,  $J$  = 17.8 Hz, 1H), 4.43 (d,  $J$  = 17.8 Hz, 1H), 3.29 (s, 3H), 2.41 (s, 3H); **<sup>13</sup>C NMR** (101 MHz, CDCl<sub>3</sub>)  $\delta$  151.8, 141.7, 133.1, 130.2, 129.7, 129.1, 127.4, 127.3, 101.6, 65.2, 60.6, 52.6, 21.5; **HRMS** (ESI):  $m/z$  [M+H]<sup>+</sup> calcd for C<sub>18</sub>H<sub>17</sub>Br<sub>2</sub>NO<sub>2</sub>: 437.9699; found: 437.9703.

**5,5-dibromo-2-cyclohexyl-6-methoxy-6-phenyl-5,6-dihydro-4H-1,3-oxazine (2t)**

63% yield, 54.1 mg (0.2 mmol scale), white solid, mp 95-97 °C; **<sup>1</sup>H NMR** (400 MHz, CDCl<sub>3</sub>)  $\delta$  7.71 (dd,  $J$  = 6.5, 2.9 Hz, 2H), 7.50 – 7.40 (m, 3H), 4.61 (d,  $J$  = 17.2 Hz, 1H), 4.14 (d,  $J$  = 17.2 Hz, 1H), 3.24 (s, 3H), 2.33 (ddd,  $J$  = 11.6, 7.5, 3.2 Hz, 1H), 2.02 (t,  $J$  = 14.2 Hz, 2H), 1.85 – 1.75 (m, 2H), 1.72-1.69 (m, 1H), 1.53 (ddd,  $J$  = 14.9, 12.7, 3.1 Hz, 2H), 1.38 – 1.20 (m, 3H); **<sup>13</sup>C NMR** (101 MHz, CDCl<sub>3</sub>)  $\delta$  159.7, 133.1, 130.1, 129.6, 127.3, 100.9, 65.5, 59.6, 52.4, 43.6, 30.0, 29.8, 25.9, 25.7; **HRMS** (ESI):  $m/z$  [M+H]<sup>+</sup> calcd for C<sub>17</sub>H<sub>21</sub>Br<sub>2</sub>NO<sub>2</sub>: 430.0012; found: 430.0019.

**5,5-dibromo-6-methoxy-2-phenethyl-6-phenyl-5,6-dihydro-4H-1,3-oxazine (2u)**

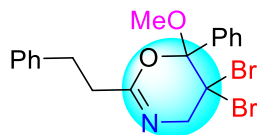

58% yield, 52.3 mg (0.2 mmol scale), white solid, mp 90-92 °C;  $^1\text{H NMR}$  (400 MHz,  $\text{CDCl}_3$ )  $\delta$  7.67 (d,  $J = 7.5$  Hz, 2H), 7.43 (d,  $J = 6.3$  Hz, 3H), 7.29 (d,  $J = 7.3$  Hz, 4H), 7.24 – 7.18 (m, 1H), 4.64 (d,  $J = 17.2$  Hz, 1H), 4.18 (d,  $J = 17.3$  Hz, 1H), 3.19 (s, 3H), 3.06 (t,  $J = 8.0$  Hz, 2H), 2.73-2.67 (m, 2H);  $^{13}\text{C NMR}$  (101 MHz,  $\text{CDCl}_3$ )  $\delta$  156.2, 140.6, 132.8, 130.1, 129.6, 128.5, 128.4, 127.3, 126.2, 101.3, 65.1, 59.8, 52.4, 35.9, 32.2; **HRMS** (ESI):  $m/z$   $[\text{M}+\text{H}]^+$  calcd for  $\text{C}_{19}\text{H}_{19}\text{Br}_2\text{NO}_2$ : 451.9856; found: 451.9850.

**(E)-5,5-dibromo-6-methoxy-6-phenyl-2-styryl-5,6-dihydro-4H-1,3-oxazine (2v)**

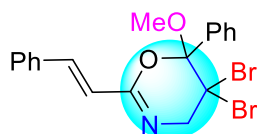

75% yield, 67.3 mg (0.2 mmol scale), white solid, mp 108-109 °C;  $^1\text{H NMR}$  (400 MHz,  $\text{CDCl}_3$ )  $\delta$  7.84 (dd,  $J = 6.1$ , 2.5 Hz, 2H), 7.54-7.51 (m, 6H), 7.41-7.35 (m, 2H), 6.60 (d,  $J = 16.2$  Hz, 1H), 4.86 (d,  $J = 18.1$  Hz, 1H), 4.41 (d,  $J = 18.1$  Hz, 1H), 3.31 (s, 3H);  $^{13}\text{C NMR}$  (101 MHz,  $\text{CDCl}_3$ )  $\delta$  152.3, 137.6, 135.1, 132.9, 130.2, 129.7, 129.5, 128.8, 127.5, 127.4, 121.1, 101.4, 64.8, 60.8, 52.5; **HRMS** (ESI):  $m/z$   $[\text{M}+\text{H}]^+$  calcd for  $\text{C}_{19}\text{H}_{17}\text{Br}_2\text{NO}_2$ : 449.9699; found: 449.9693.

**5,5-dibromo-6-methoxy-6-phenyl-2-(thiophen-2-yl)-5,6-dihydro-4H-1,3-oxazine**

**(2w)**

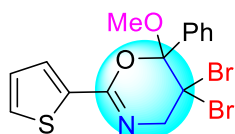

75% yield, 64.3 mg (0.2 mmol scale), white solid, mp 135-137

°C; **<sup>1</sup>H NMR** (400 MHz, CDCl<sub>3</sub>) δ 7.90 (dd, *J* = 6.5, 3.1 Hz, 2H), 7.85 – 7.72 (m, 1H), 7.67 – 7.49 (m, 4H), 7.16 (dd, *J* = 4.9, 3.8 Hz, 1H), 4.94 (d, *J* = 17.9 Hz, 1H), 4.47 (d, *J* = 17.9 Hz, 1H), 3.38 (s, 3H); **<sup>13</sup>C NMR** (101 MHz, CDCl<sub>3</sub>) δ 148.6, 136.0, 132.7, 130.1, 129.8, 129.6, 128.8, 127.5, 127.4, 101.9, 64.6, 60.4, 52.6; **HRMS** (ESI): *m/z* [M+H]<sup>+</sup> calcd for C<sub>15</sub>H<sub>13</sub>Br<sub>2</sub>NO<sub>2</sub>S: 429.9107; found: 429.9113.

### 5,5-dibromo-6-ethoxy-2,6-diphenyl-5,6-dihydro-4H-1,3-oxazine (2x)

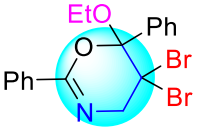 67% yield, 58.6 mg (0.2 mmol scale), white solid, mp 112-115 °C; **<sup>1</sup>H NMR** (400 MHz, CDCl<sub>3</sub>) δ 8.05 (d, *J* = 7.3 Hz, 2H), 7.85 (dd, *J* = 6.3, 2.7 Hz, 2H), 7.55 – 7.40 (m, 6H), 4.93 (d, *J* = 17.8 Hz, 1H), 4.44 (d, *J* = 17.8 Hz, 1H), 3.53 (q, *J* = 7.0 Hz, 2H), 1.14 (t, *J* = 7.0 Hz, 3H); **<sup>13</sup>C NMR** (101 MHz, CDCl<sub>3</sub>) δ 152.0, 133.8, 132.1, 131.3, 130.0, 129.7, 128.4, 127.4, 127.3, 101.5, 65.3, 61.4, 60.6, 15.1; **HRMS** (ESI): *m/z* [M+H]<sup>+</sup> calcd for C<sub>18</sub>H<sub>17</sub>Br<sub>2</sub>NO<sub>2</sub>:437.9699; found: 437.9697.

### 5,5-dibromo-6-(methoxy-d3)-6-(4-methoxyphenyl)-2-phenyl-5,6-dihydro-4H-1,3-oxazine (2y)

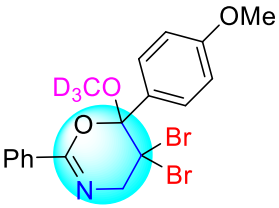 80% yield, 73.1 mg (0.2 mmol scale), white solid, mp 118-121 °C; **<sup>1</sup>H NMR** (400 MHz, CDCl<sub>3</sub>) δ 8.10 – 8.03 (m, 2H), 7.76 (d, *J* = 8.9 Hz, 2H), 7.53-7.43 (m, 3H), 7.01 (d, *J* = 8.9 Hz, 2H), 4.89 (d, *J* = 17.9 Hz, 1H), 4.45 (d, *J* = 17.9 Hz, 1H), 3.88 (s, 3H); **<sup>13</sup>C NMR** (101 MHz, CDCl<sub>3</sub>) δ 160.6, 151.8, 132.1, 131.5, 131.2, 128.4, 127.2, 125.1,



112.8, 101.7, 66.0, 60.6, 55.3; **HRMS** (EI):  $m/z$   $[M+H]^+$  calcd for  $C_{18}H_{14}D_3Br_2NO_3$ :  
456.9836; found: 456.9832.

**5-bromo-2,6-diphenyl-4H-1,3-oxazine (2a')**

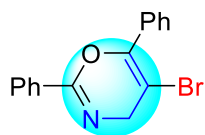

85% yield, 53.2 mg (0.2 mmol scale), white solid, mp 122-123 °C;

**$^1H$  NMR** (400 MHz,  $CDCl_3$ )  $\delta$  7.97 (d,  $J = 7.4$  Hz, 2H), 7.80 –  
7.70 (m, 2H), 7.44 (dt,  $J = 15.3, 8.2$  Hz, 6H), 4.53 (s, 2H);  **$^{13}C$  NMR** (101 MHz,  
 $CDCl_3$ )  $\delta$  152.7, 145.2, 132.4, 131.4, 131.3, 129.5, 128.5, 128.31, 128.2, 127.3, 97.9,  
51.6; **HRMS** (EI):  $m/z$   $[M+H]^+$  calcd for  $C_{16}H_{13}BrNO$ : 314.0175; found: 314.0183.

#### 4. $^1\text{H}$ and $^{13}\text{C}$ NMR Spectrum

##### 5,5-dibromo-6-methoxy-2,6-diphenyl-5,6-dihydro-4H-1,3-oxazine (2a)

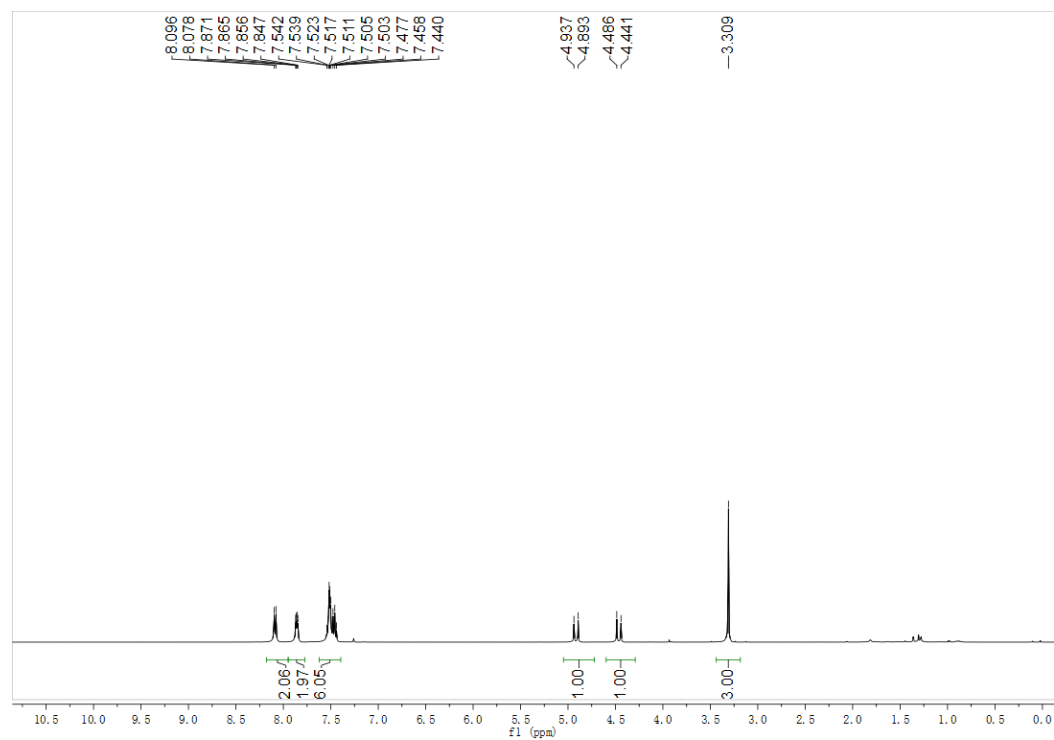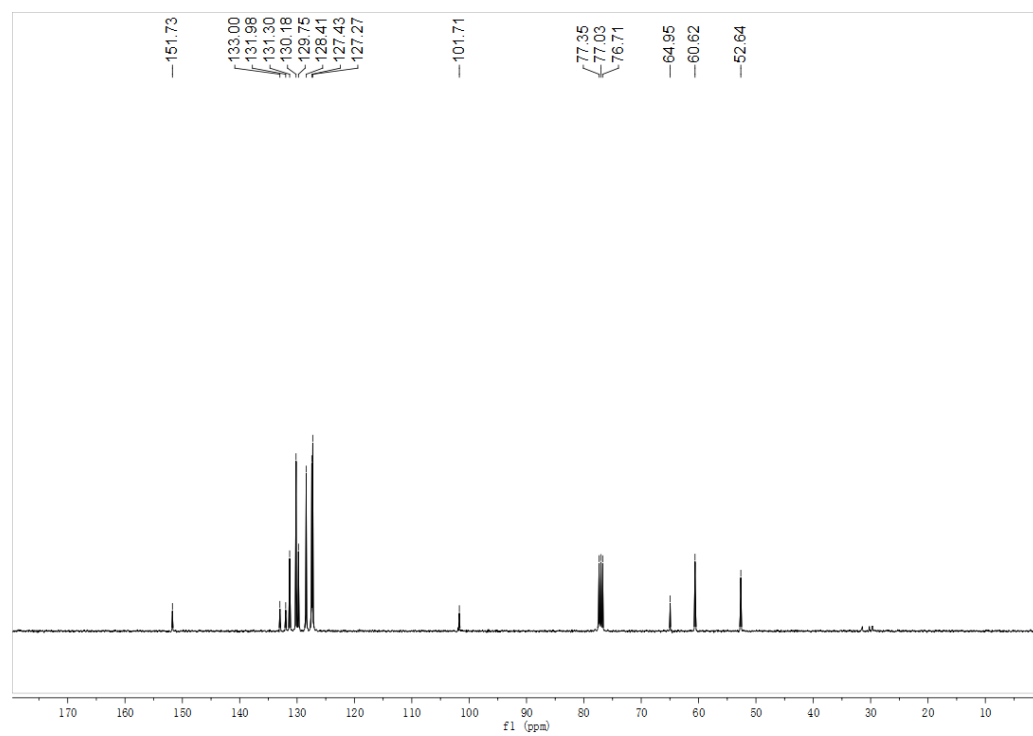

**5,5-dibromo-6-methoxy-2-phenyl-6-(p-tolyl)-5,6-dihydro-4H-1,3-oxazine (2b)**

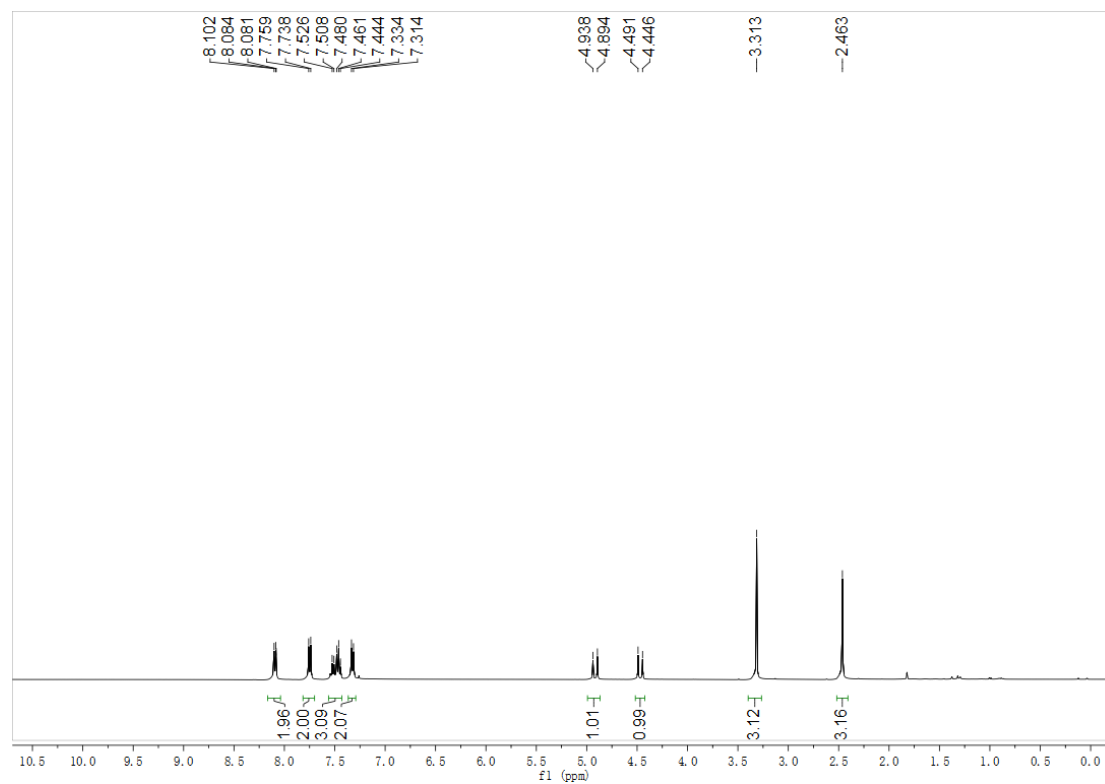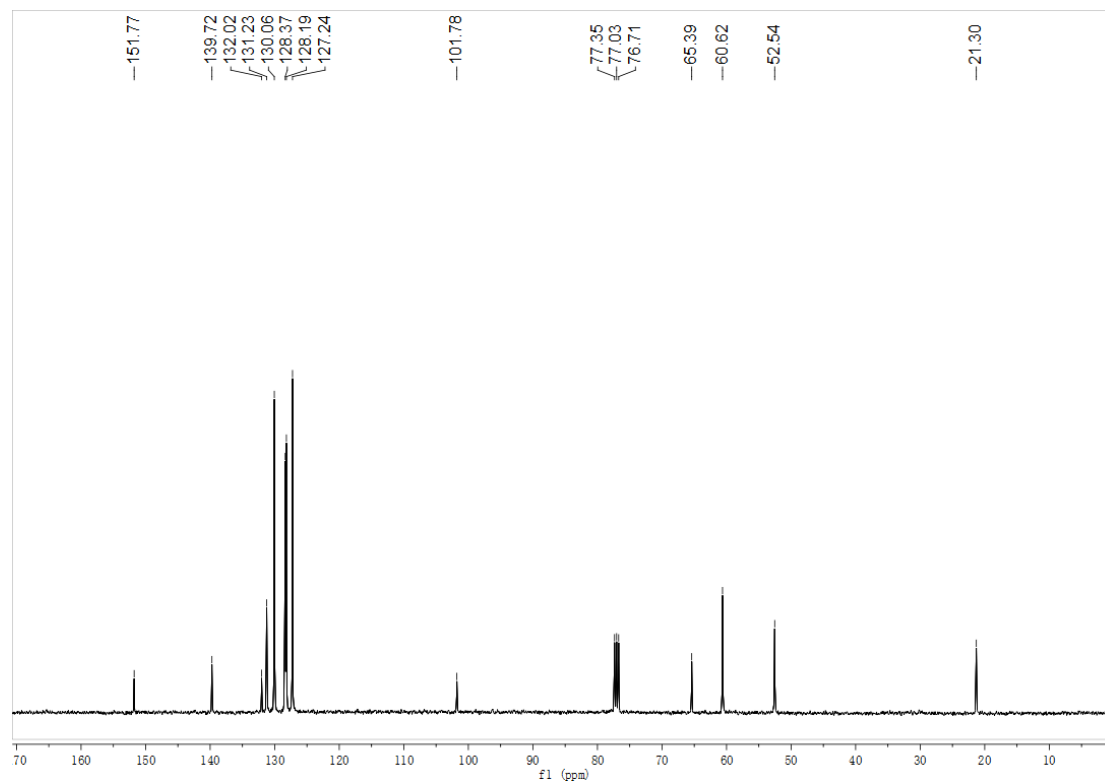

**5,5-dibromo-6-methoxy-6-(4-methoxyphenyl)-2-phenyl-5,6-dihydro-4H-1,3-oxa**

**zine (2c)**

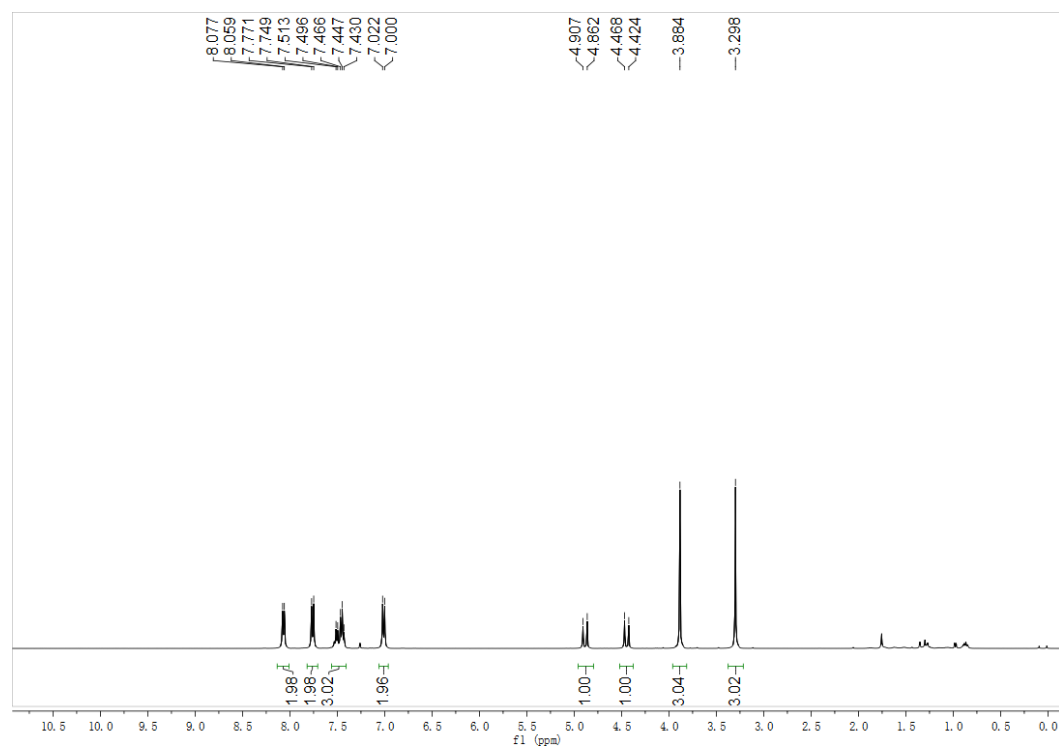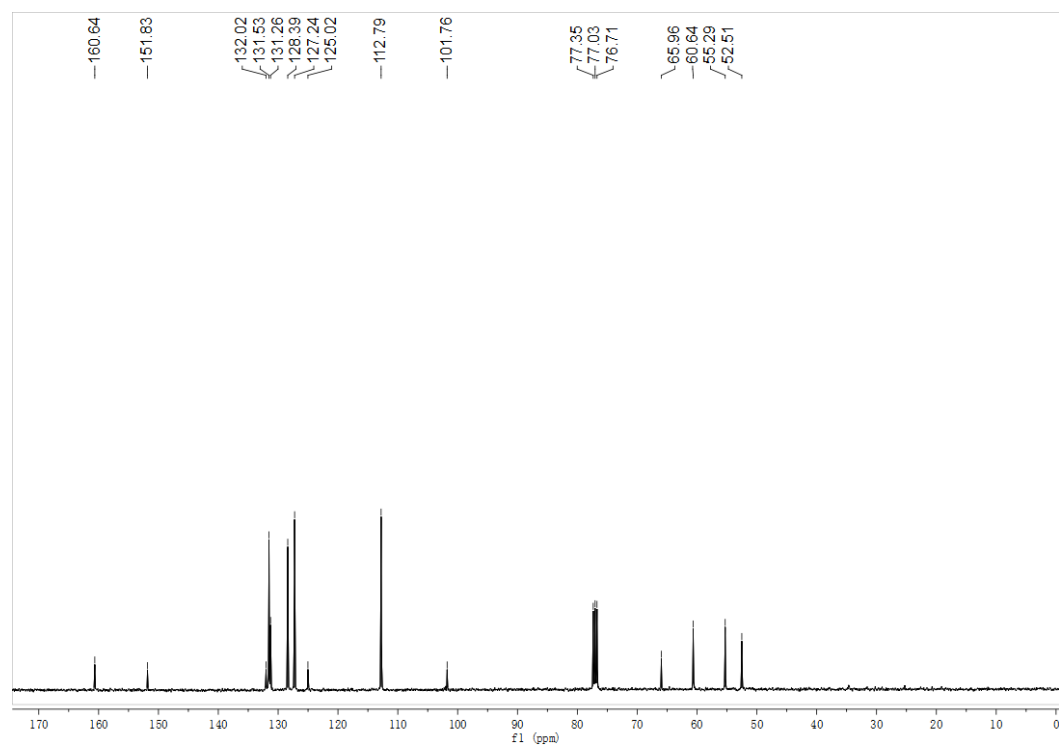

**5,5-dibromo-6-(4-chlorophenyl)-6-methoxy-2-phenyl-5,6-dihydro-4H-1,3-oxazin**

**e(2d)**

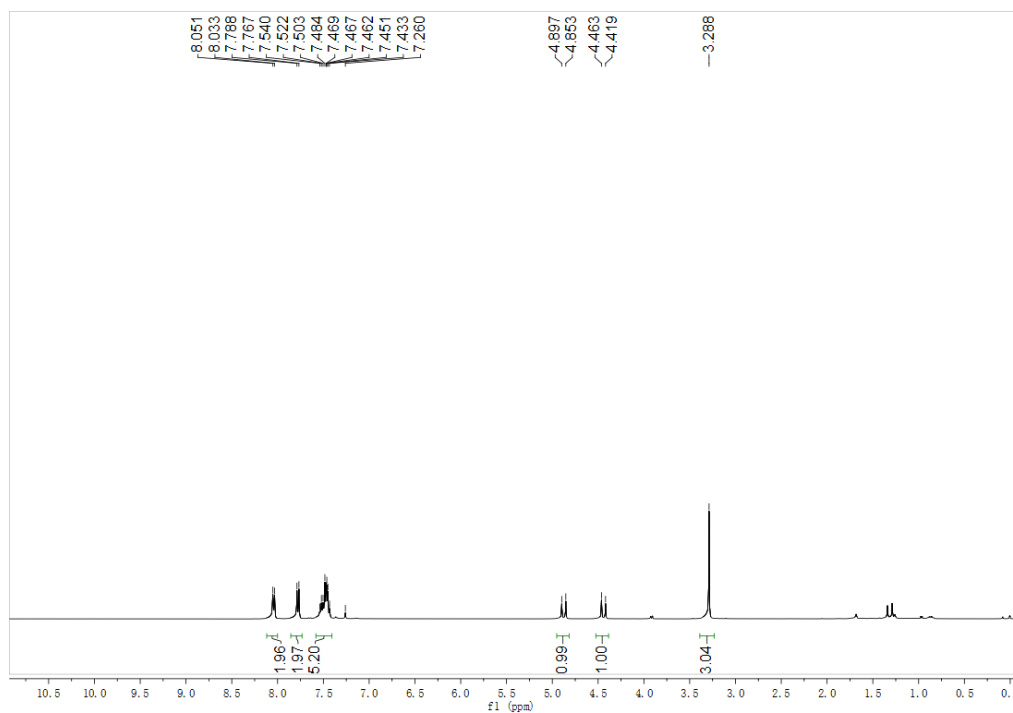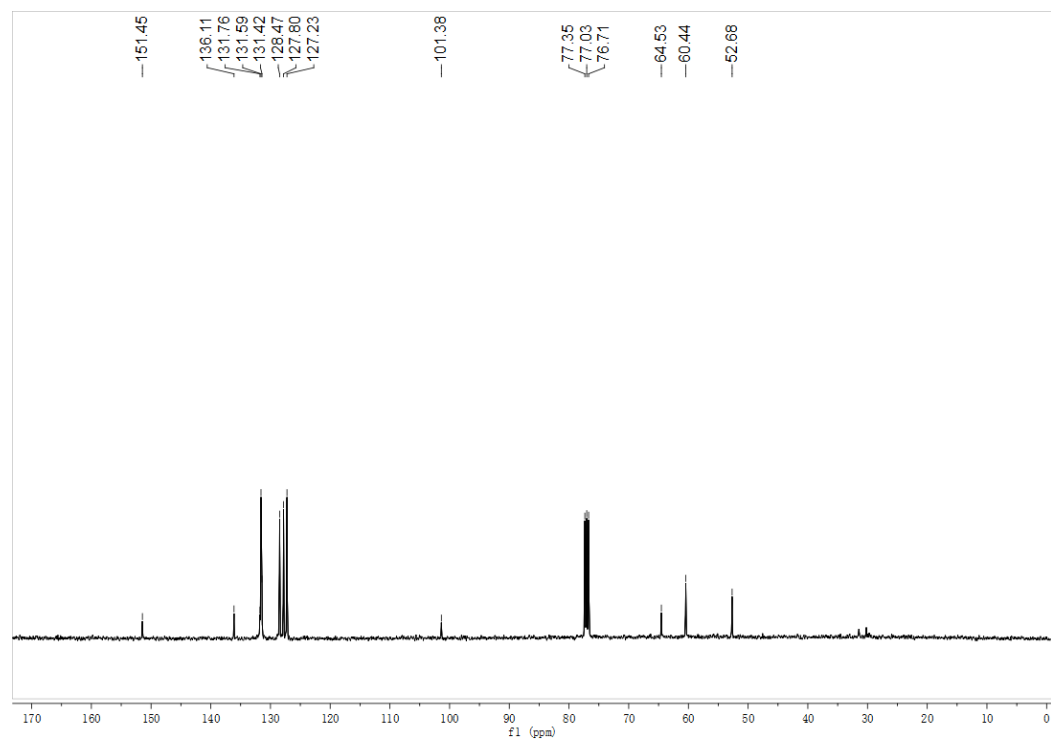

**5,5-dibromo-6-(4-fluorophenyl)-6-methoxy-2-phenyl-5,6-dihydro-4H-1,3-oxazin**

**e(2e)**

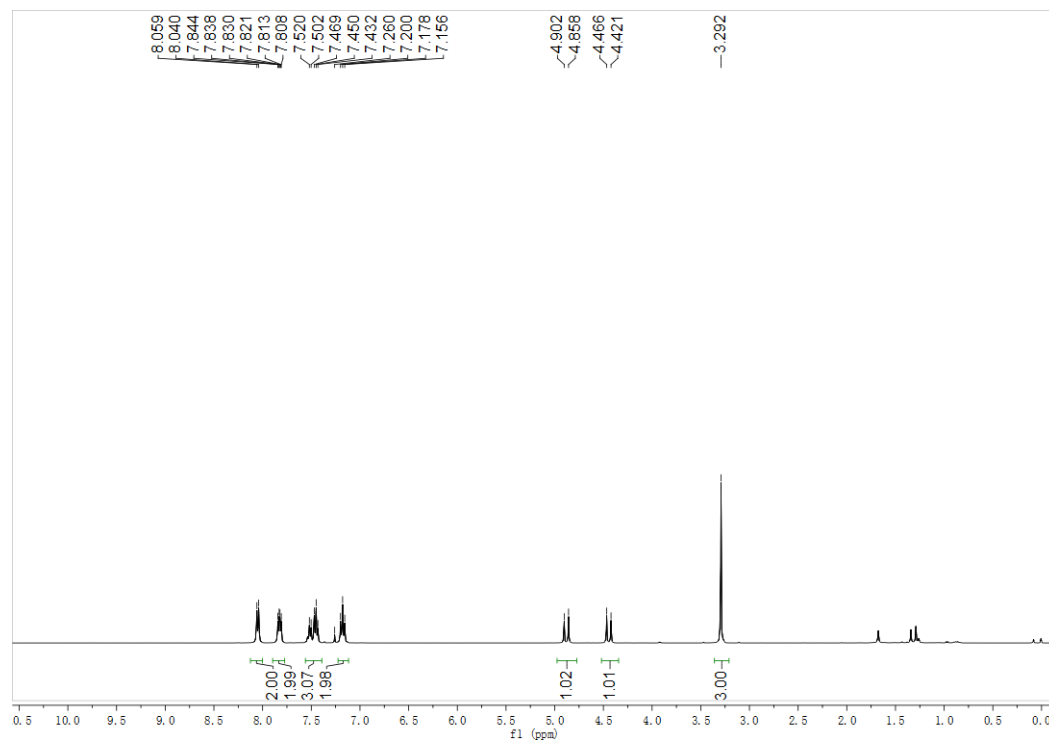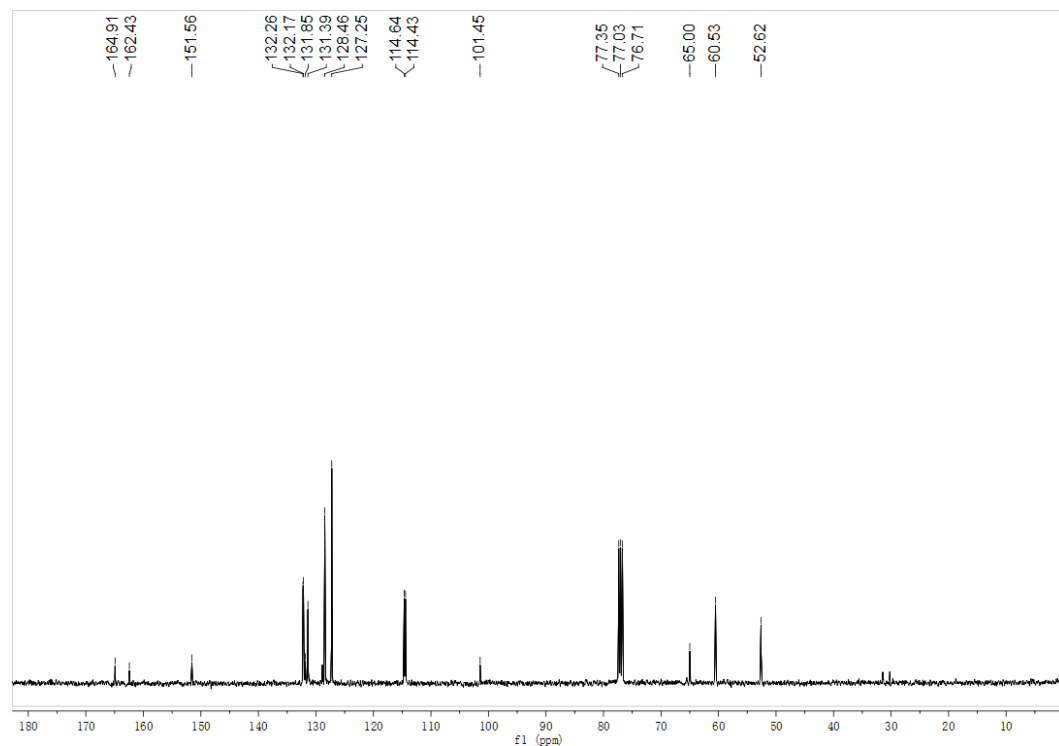

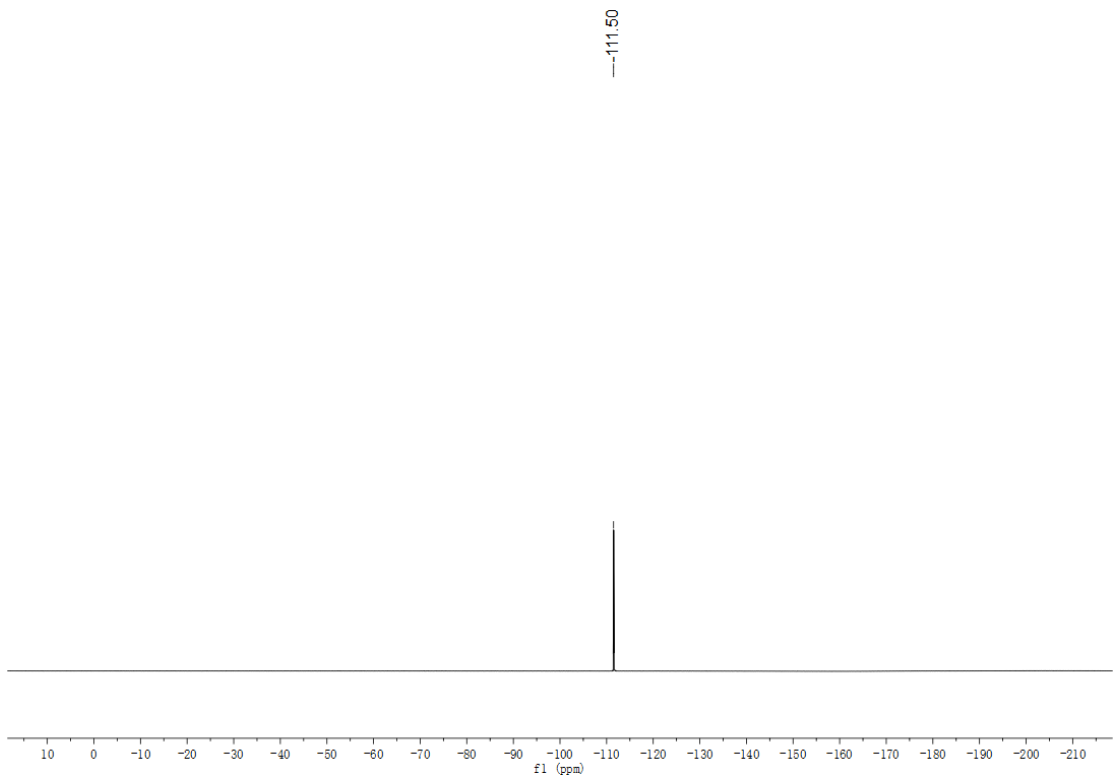

**5,5-dibromo-6-(4-(tert-butyl)phenyl)-6-methoxy-2-phenyl-5,6-dihydro-4H-1,3-oxazine(2f)**

**xazine(2f)**

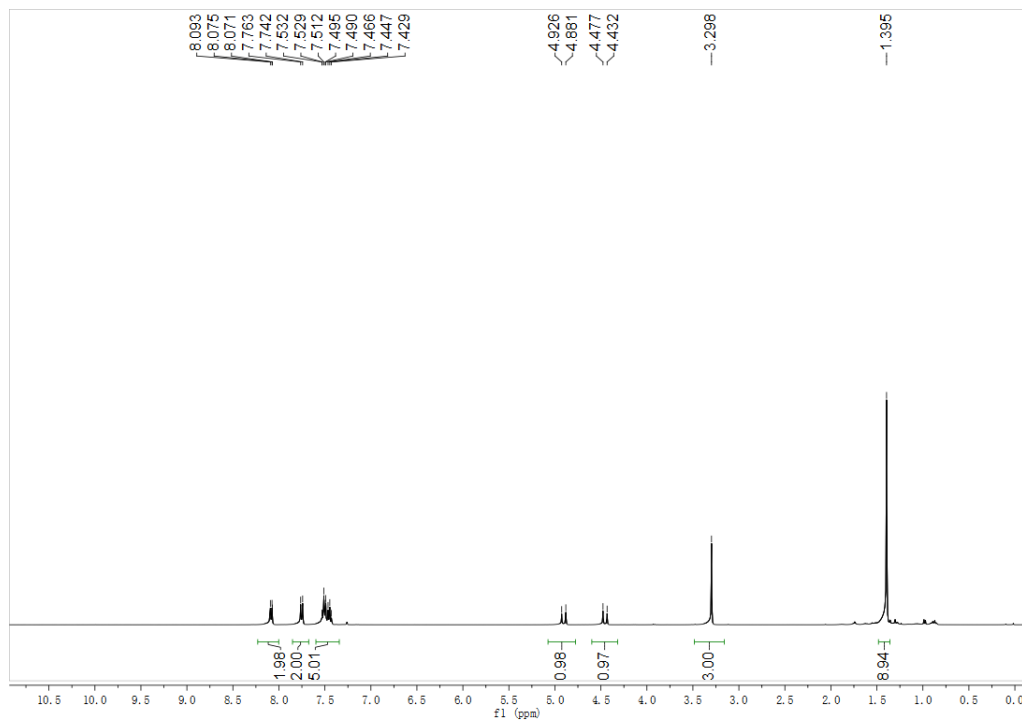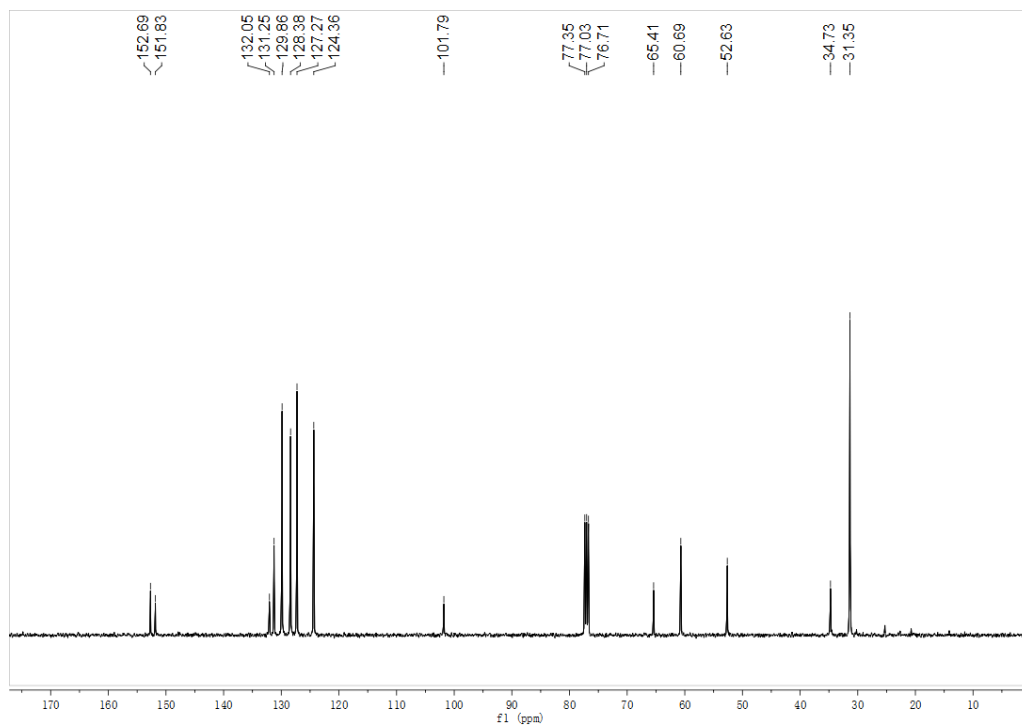



**Ethyl-4-(5,5-dibromo-6-methoxy-2-phenyl-5,6-dihydro-4H-1,3-oxazin-6-yl)benz**

**oate(2g)**

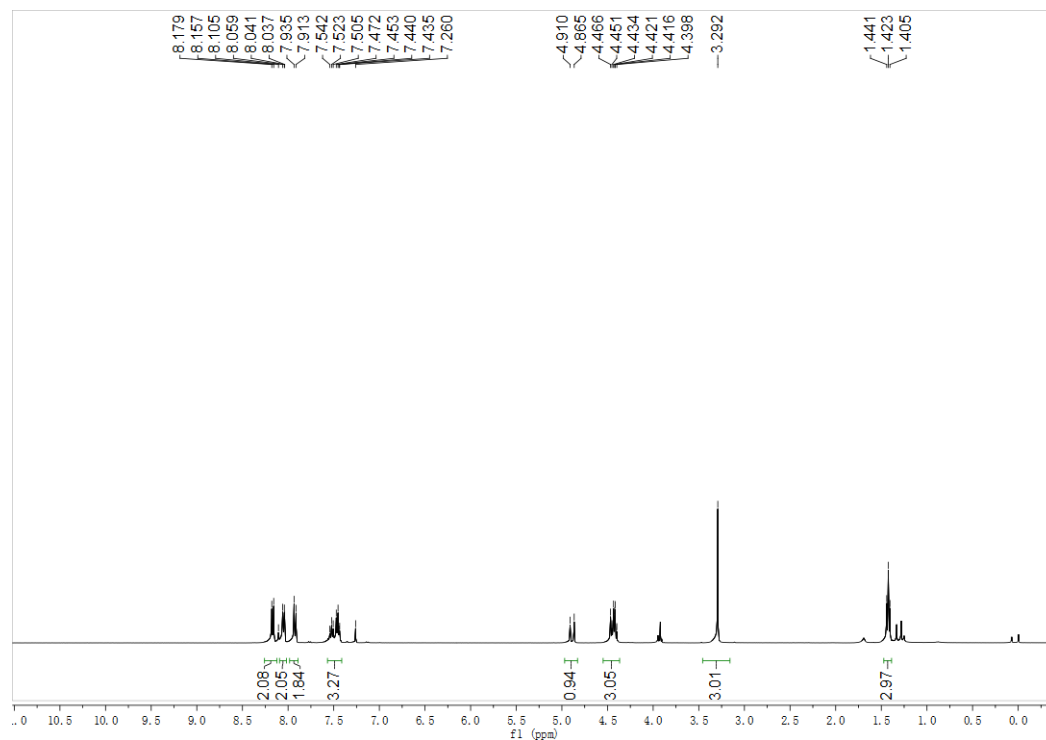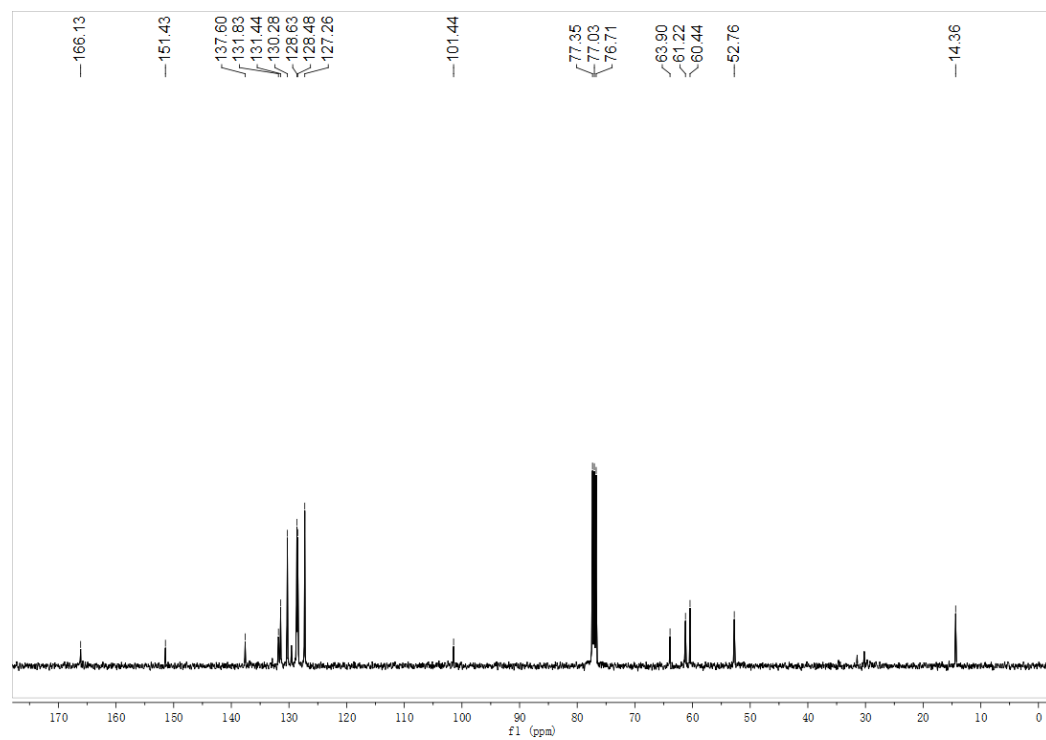

**5,5-dibromo-6-(3-chlorophenyl)-6-methoxy-2-phenyl-5,6-dihydro-4H-1,3-oxazin**

**e (2h)**

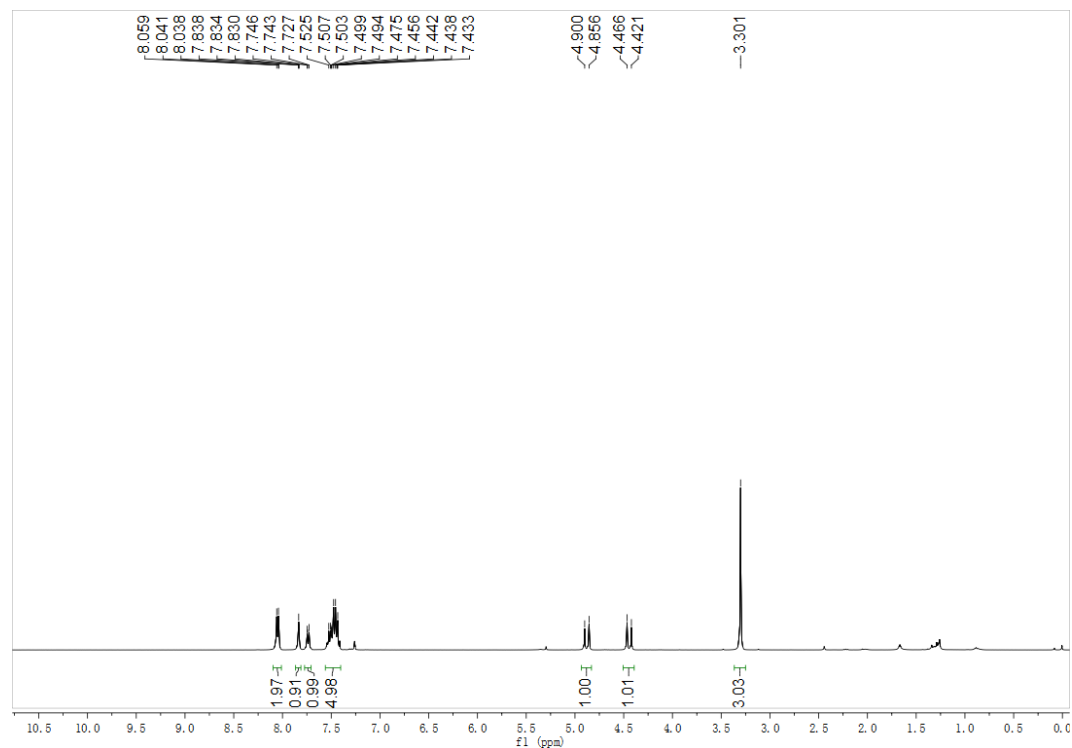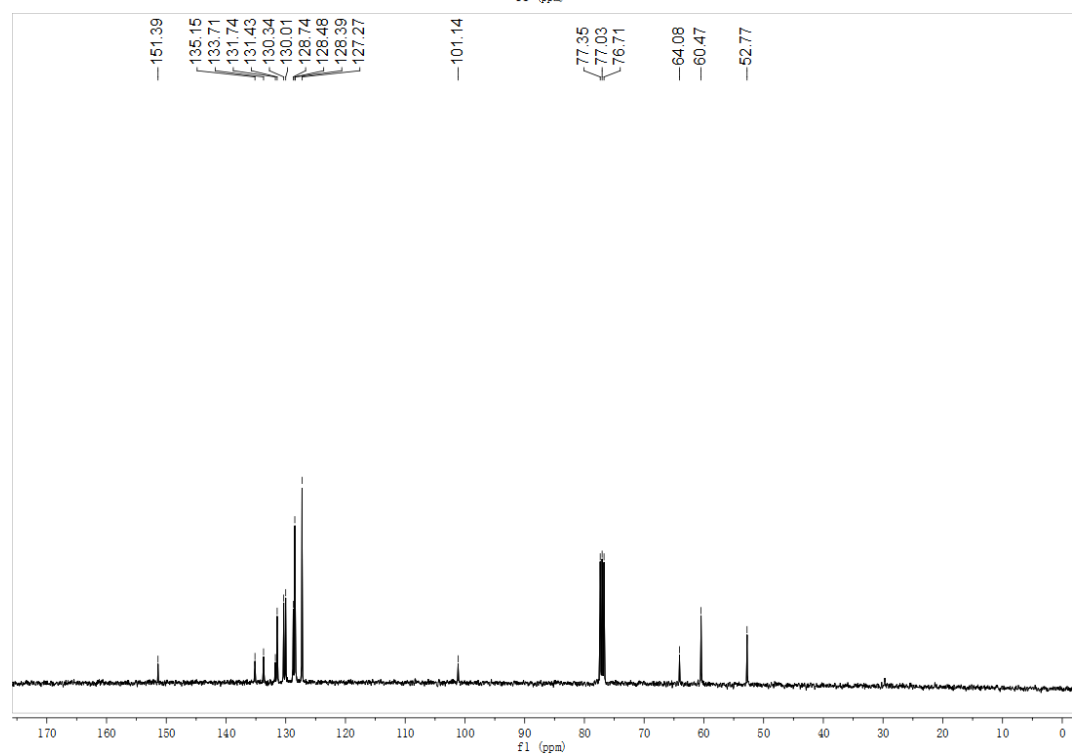

**5,5-dibromo-6-methoxy-2-phenyl-6-(m-tolyl)-5,6-dihydro-4H-1,3-oxazine (2i)**

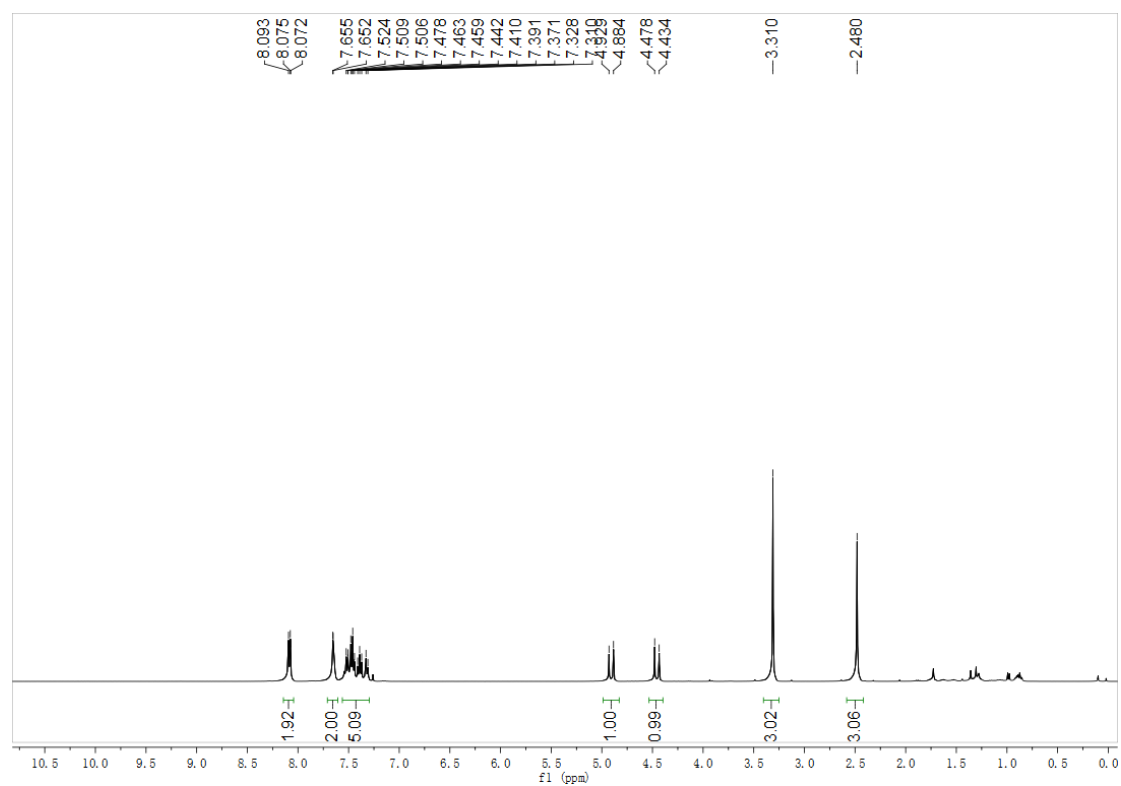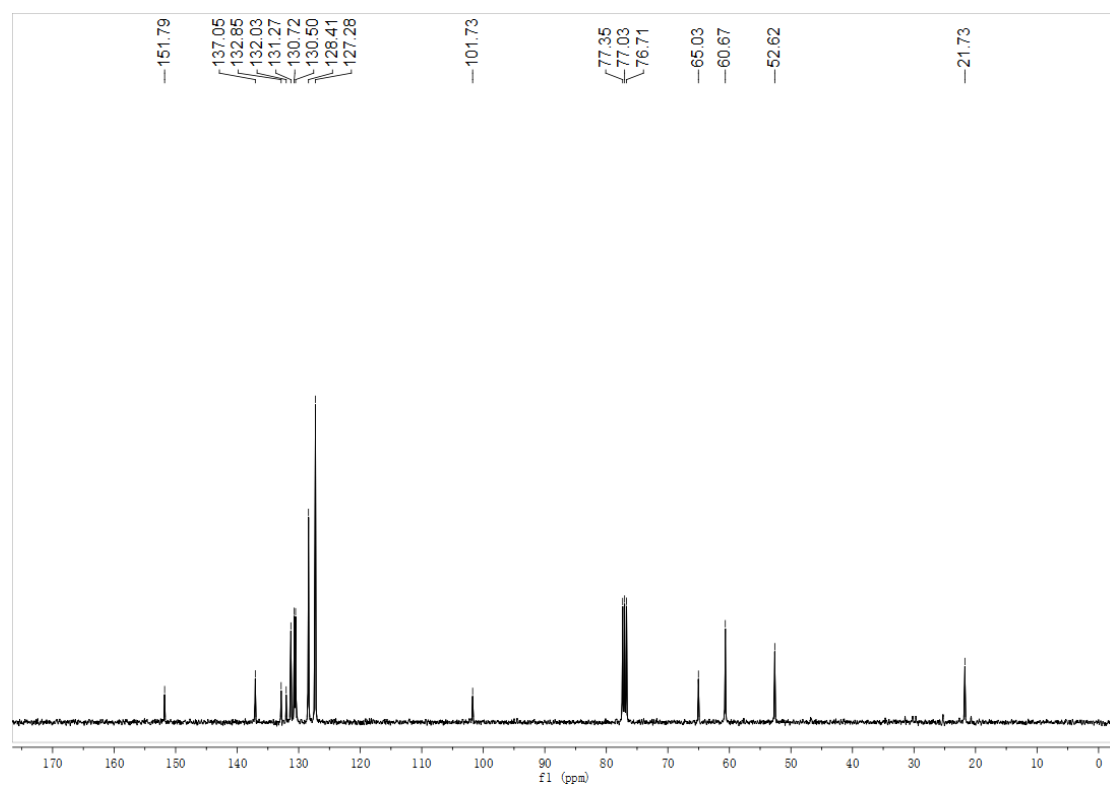

**5,5-dibromo-6-methoxy-6-(3-methoxyphenyl)-2-phenyl-5,6-dihydro-4H-1,3-oxazine (2j)**

**zine (2j)**

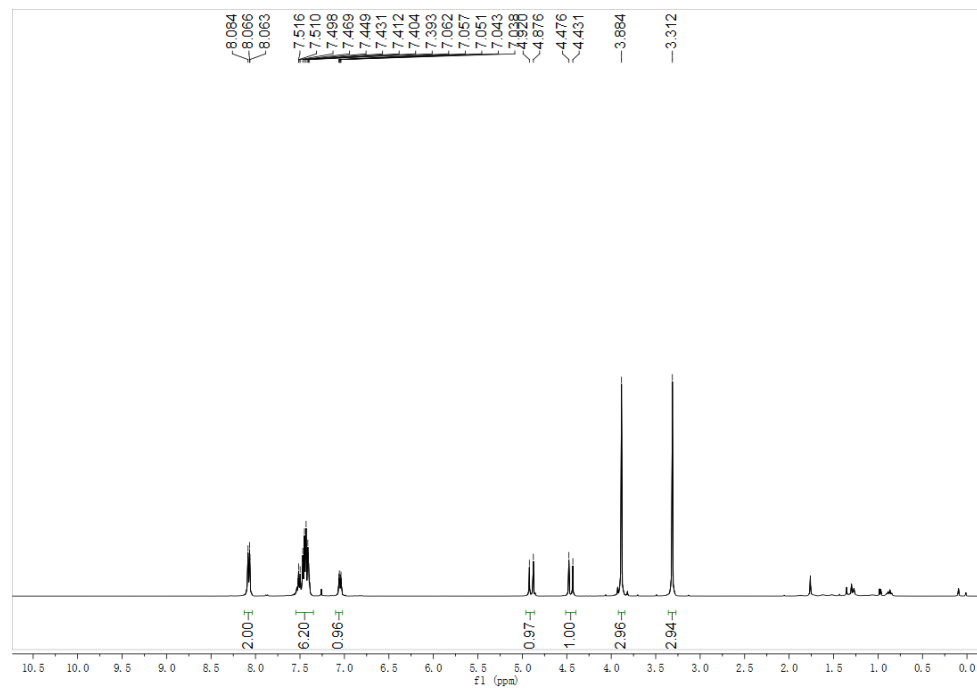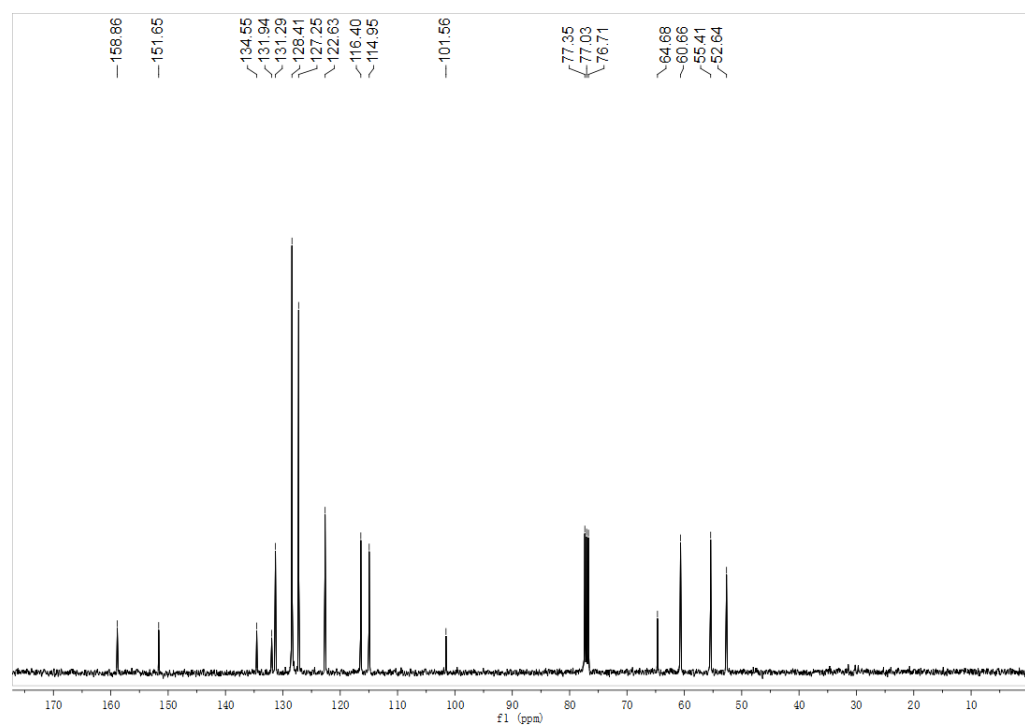

**5,5-dibromo-6-methoxy-6-(2-methoxyphenyl)-2-phenyl-5,6-dihydro-4H-1,3-oxa**

**zine (2k)**

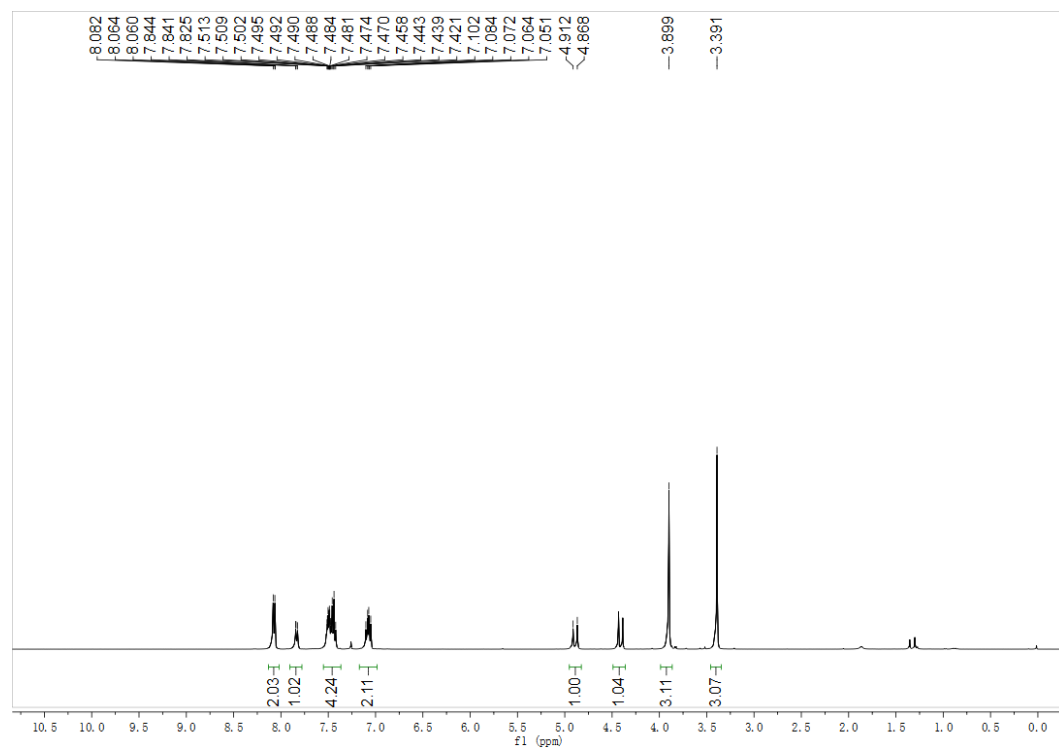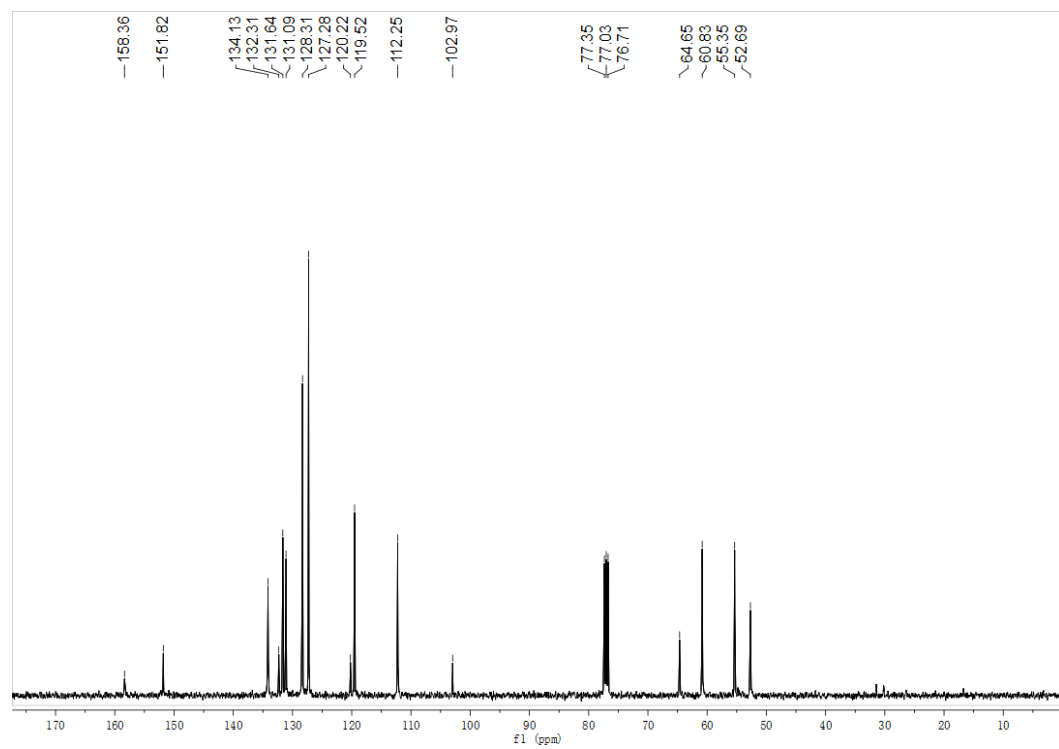

**5,5-dibromo-6-(3,5-dimethylphenyl)-6-methoxy-2-phenyl-5,6-dihydro-4H-1,3-oxazine (2l)**

**xazine (2l)**

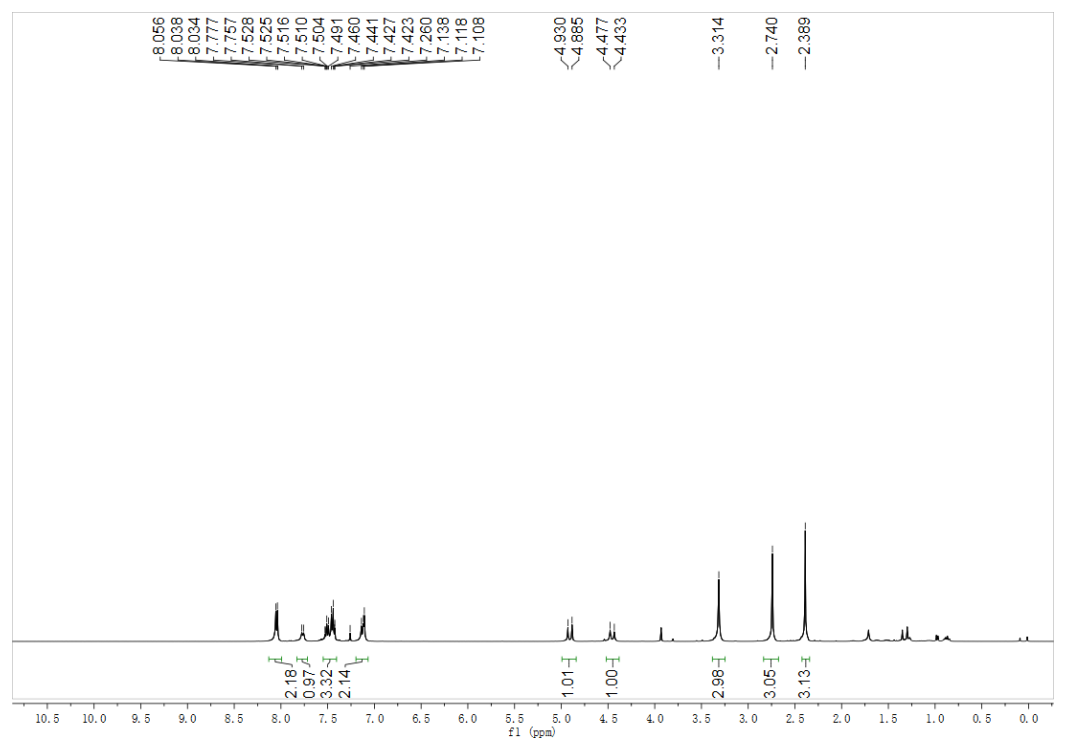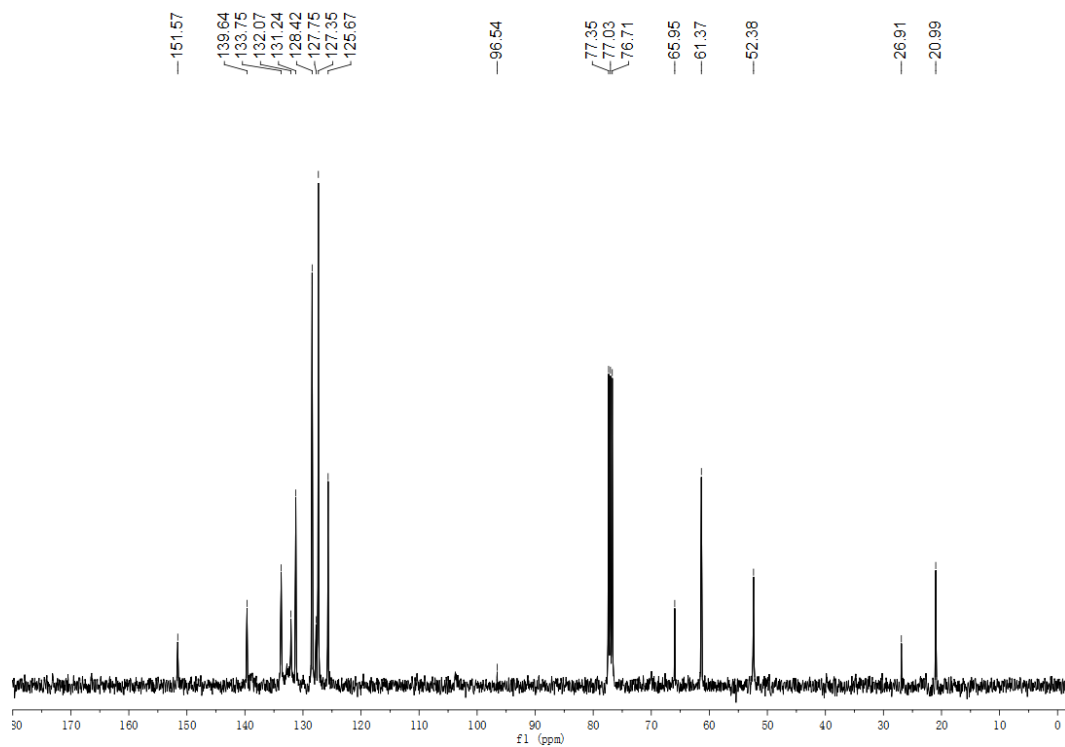

**5,5-dibromo-2-(2-fluorophenyl)-6-methoxy-6-phenyl-5,6-dihydro-4H-1,3-oxazin**

**e (2m)**

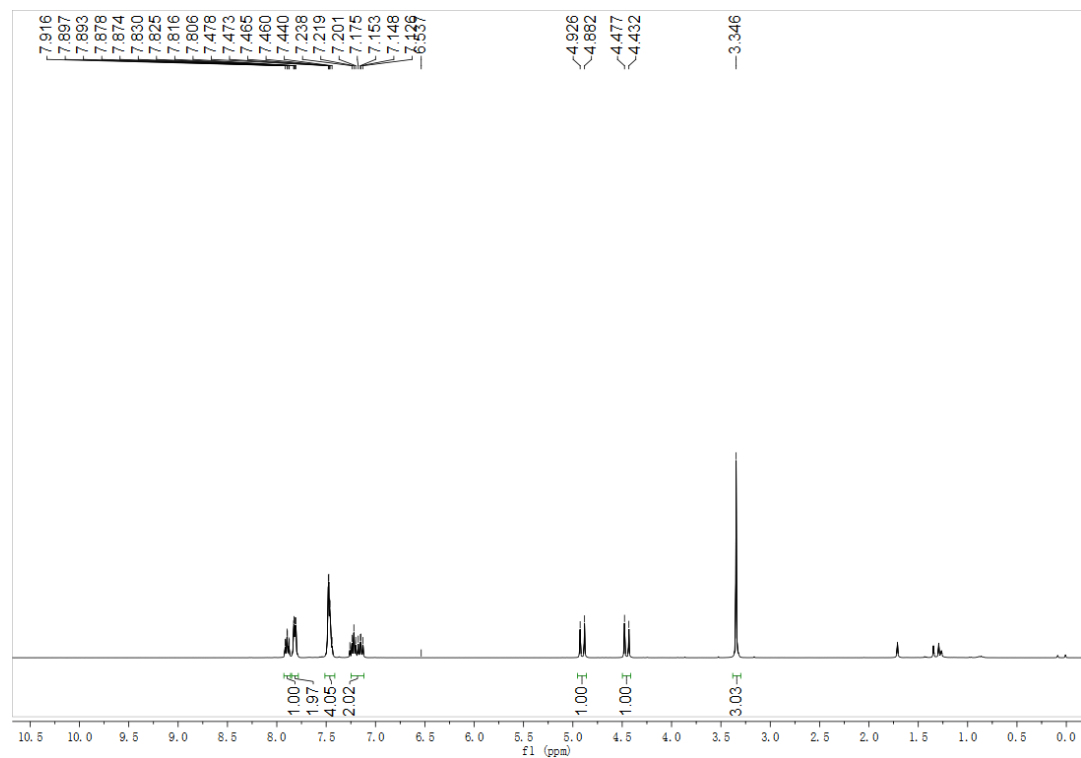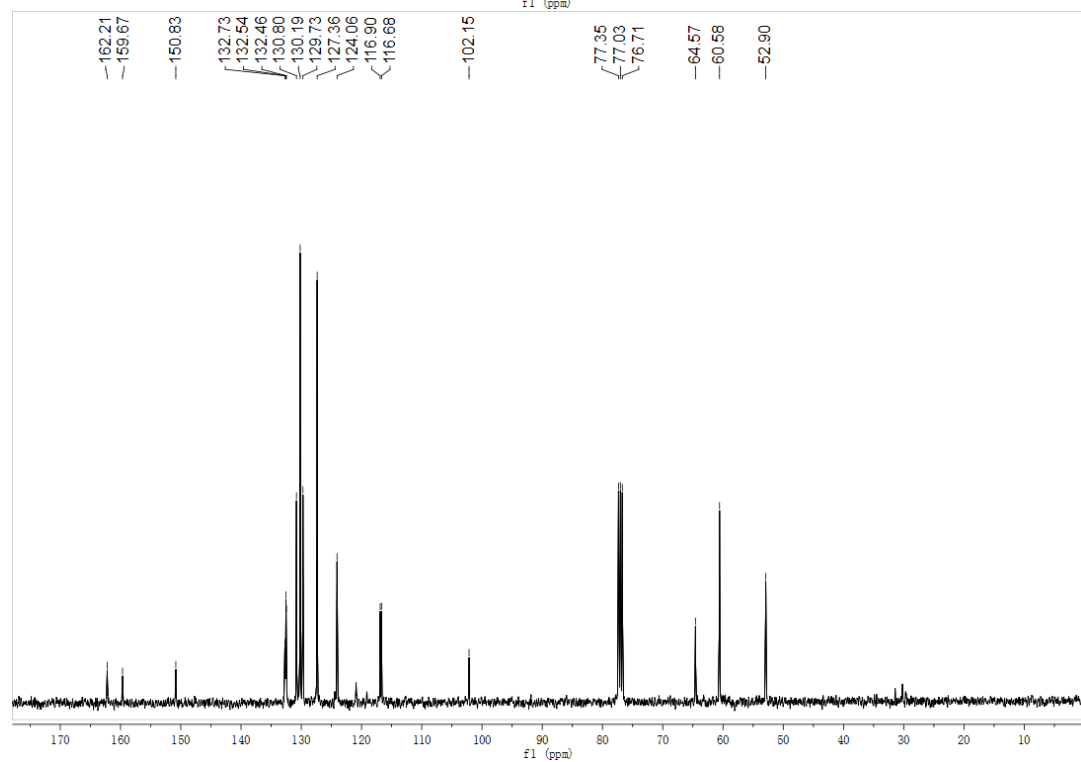

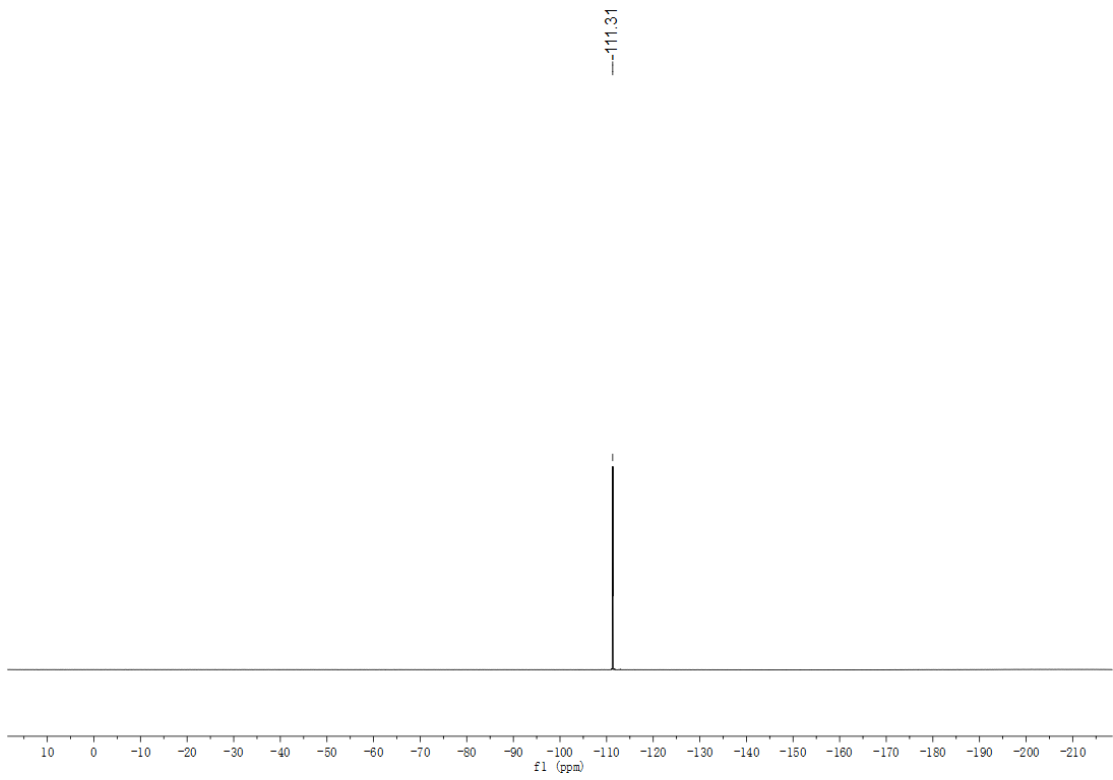



**5,5-dibromo-2-(2-bromophenyl)-6-methoxy-6-phenyl-5,6-dihydro-4H-1,3-oxazine**

**ne (2n)**

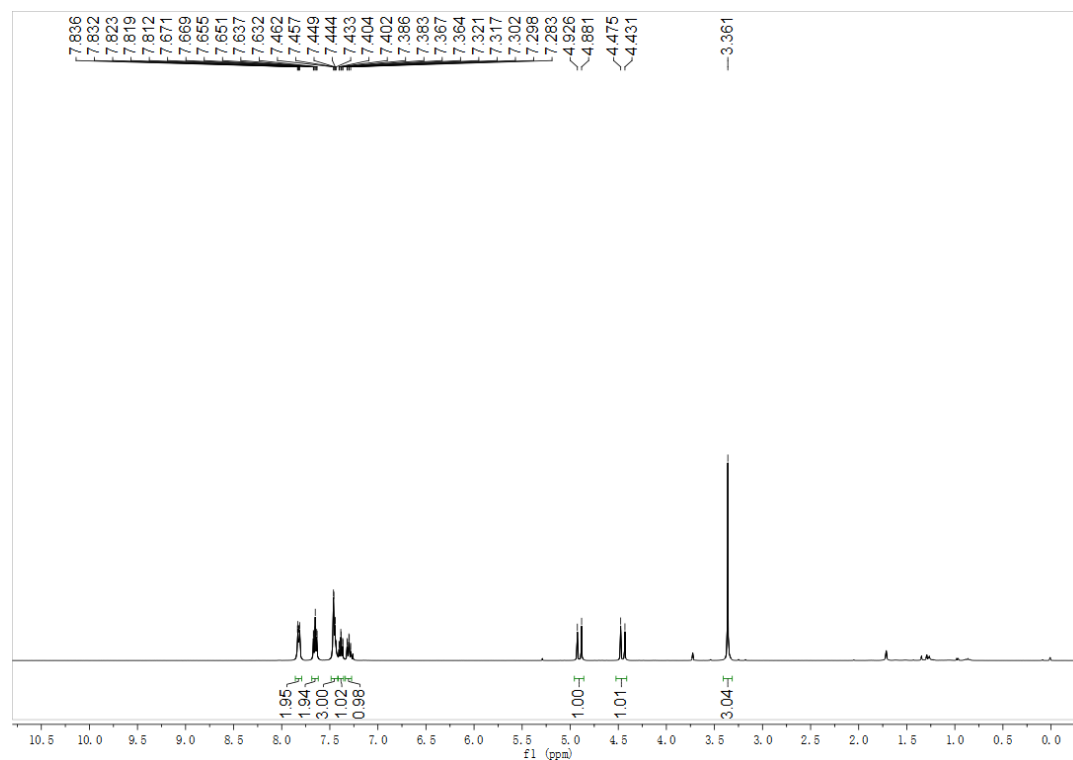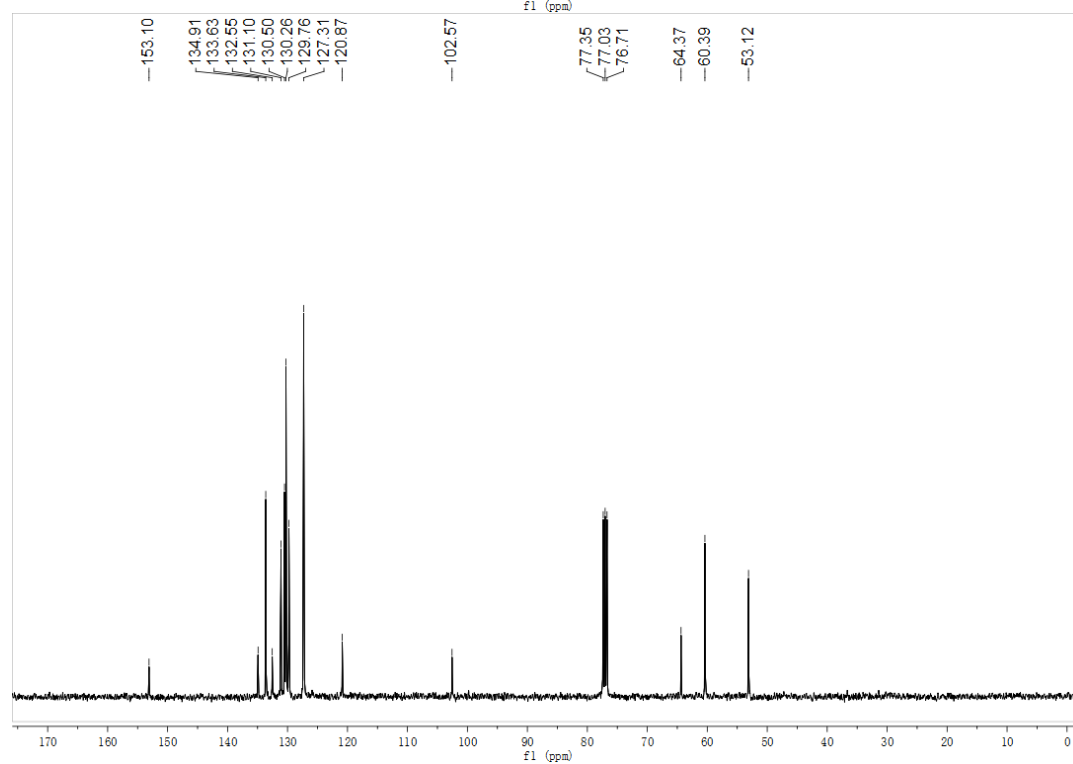

**5,5-dibromo-2-(2-iodophenyl)-6-methoxy-6-phenyl-5,6-dihydro-4H-1,3-oxazine**

**(2o)**

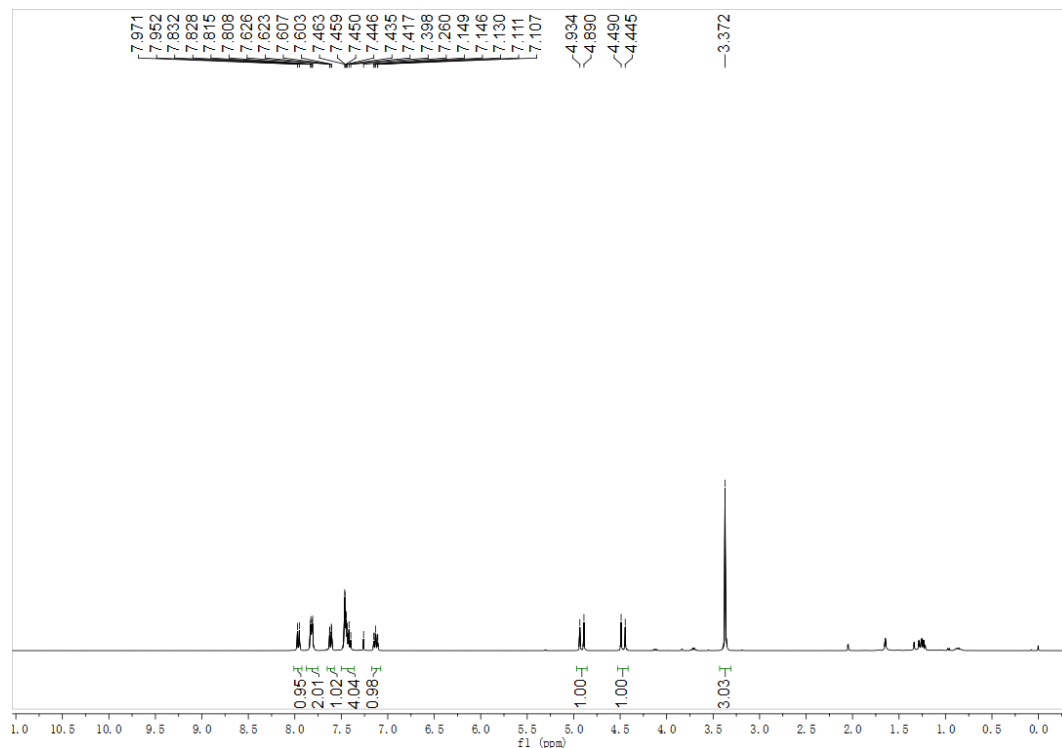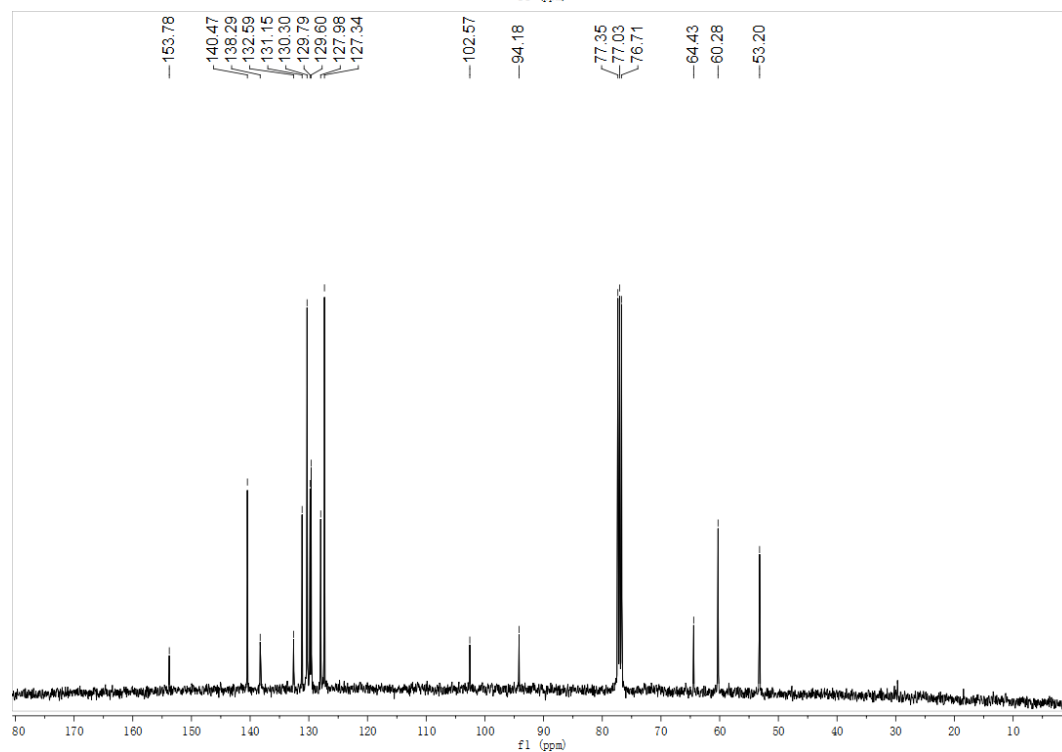

**5,5-dibromo-6-methoxy-2-(3-methoxyphenyl)-6-phenyl-5,6-dihydro-4H-1,3-oxazine (2p)**

**zine (2p)**

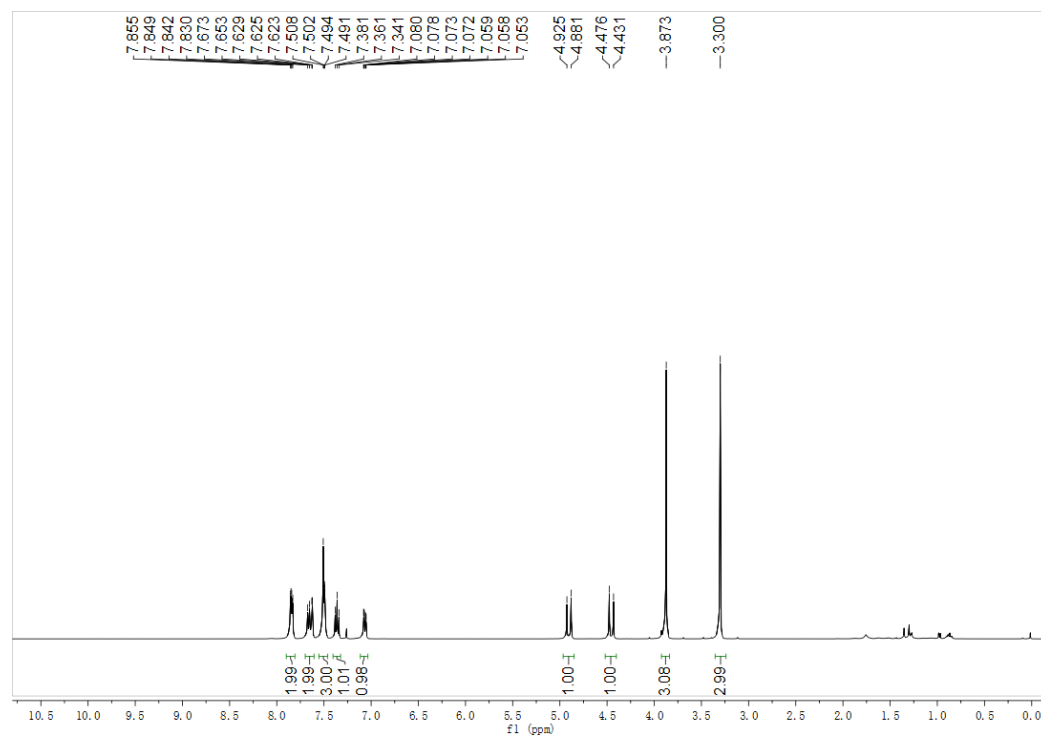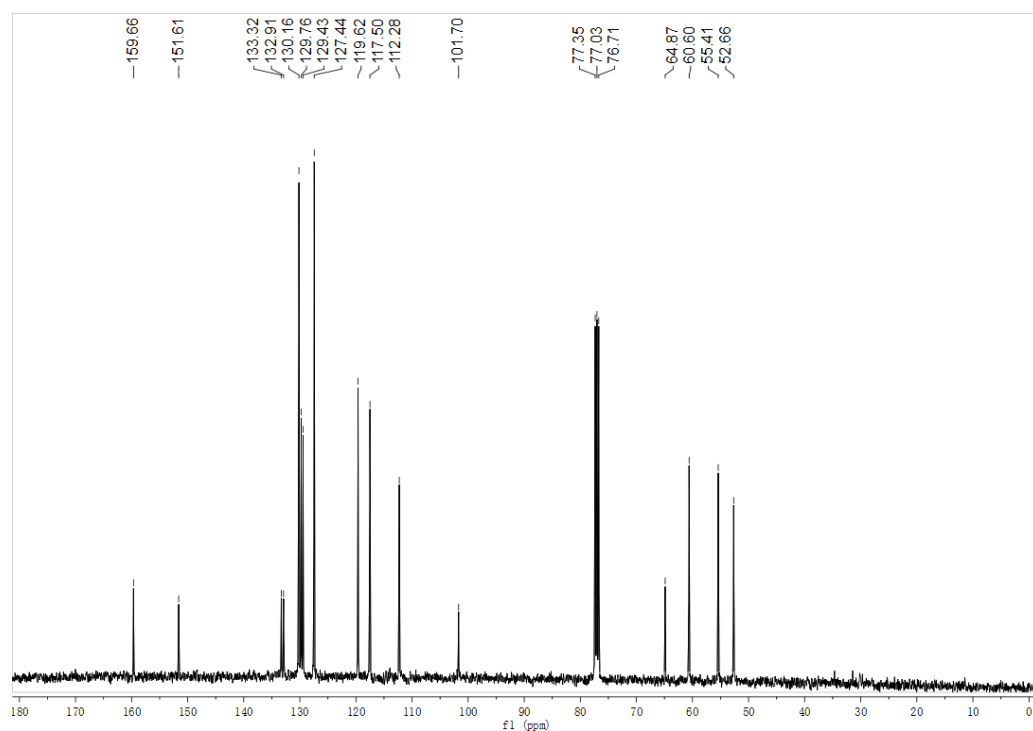

**5,5-dibromo-6-methoxy-6-phenyl-2-(3-(trifluoromethyl)phenyl)-5,6-dihydro-4H**

**-1,3-oxazine (2q)**

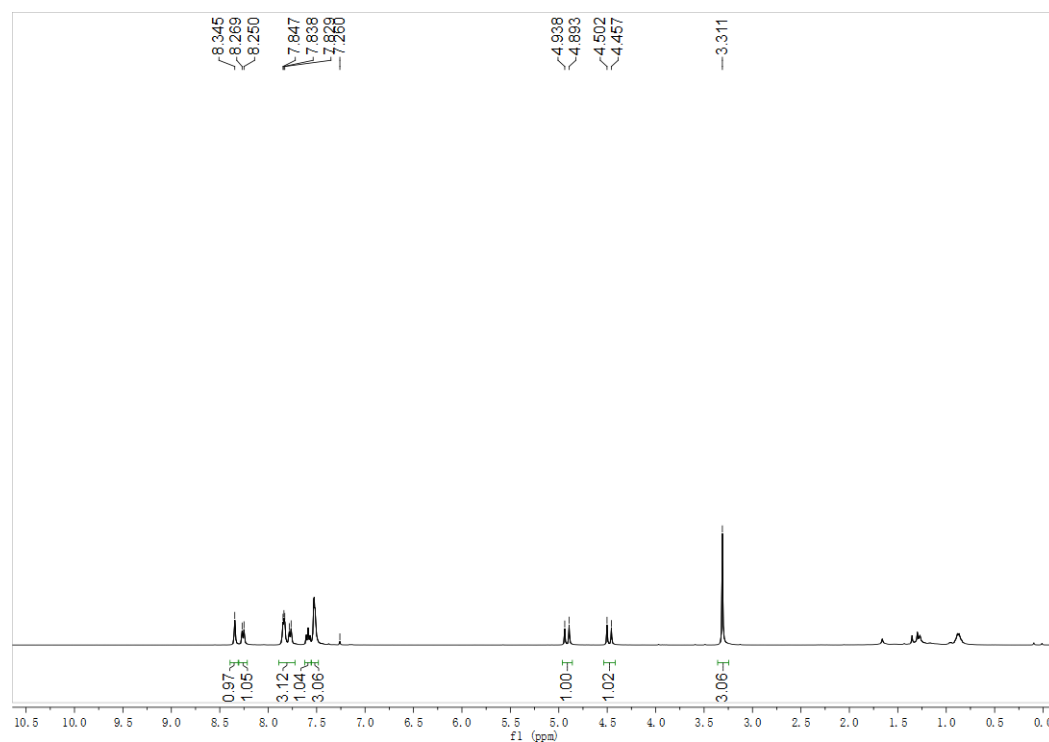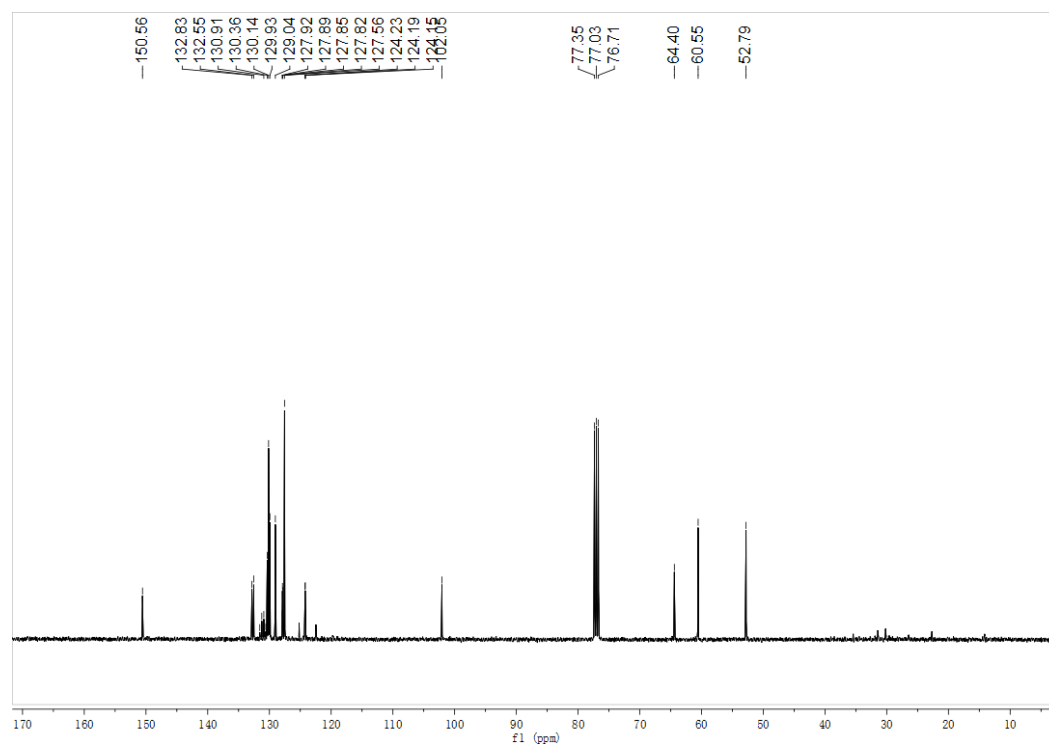

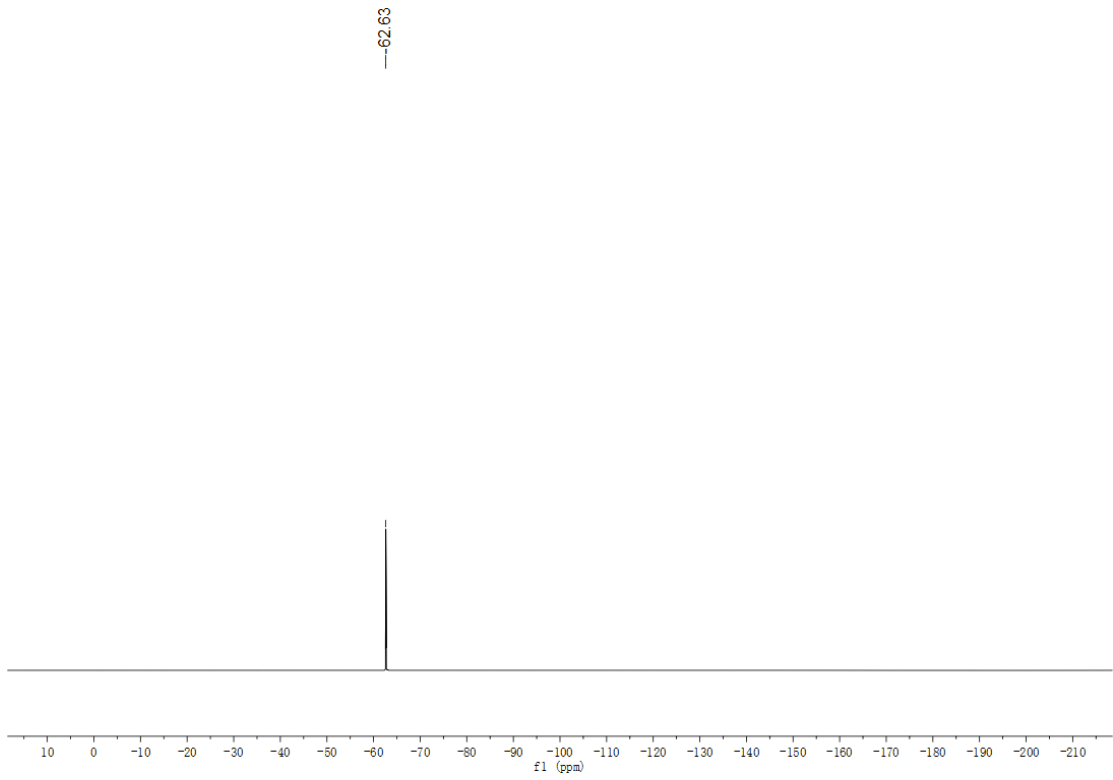

**5,5-dibromo-2-(4-chlorophenyl)-6-methoxy-6-phenyl-5,6-dihydro-4H-1,3-oxazin**

**e (2r)**

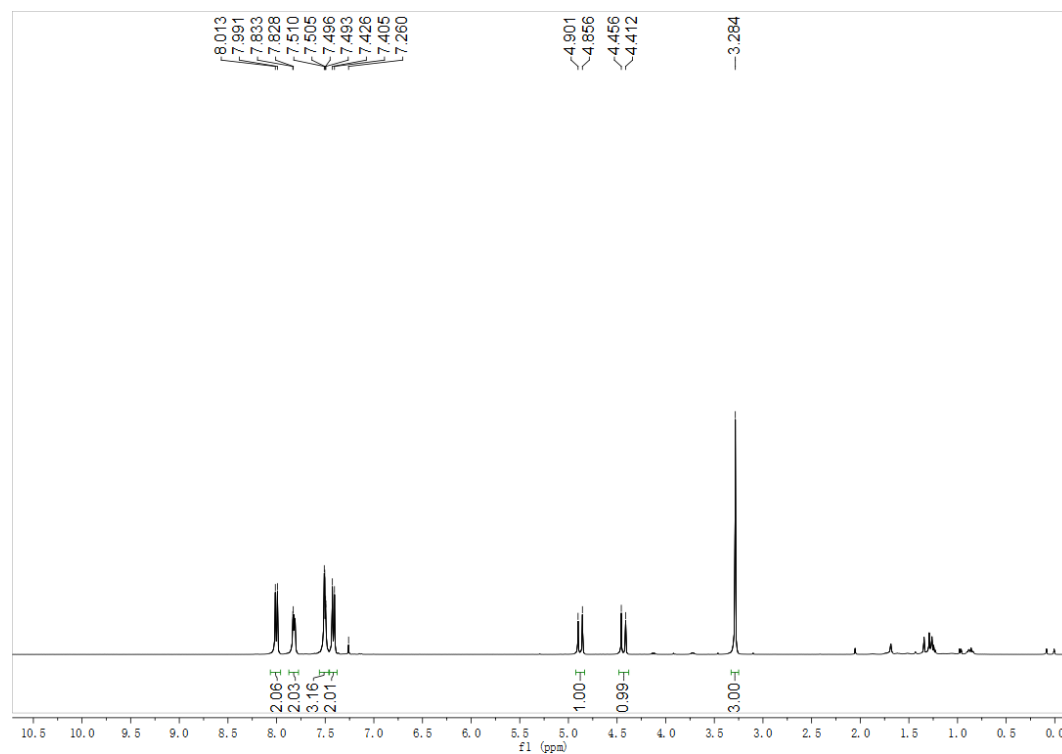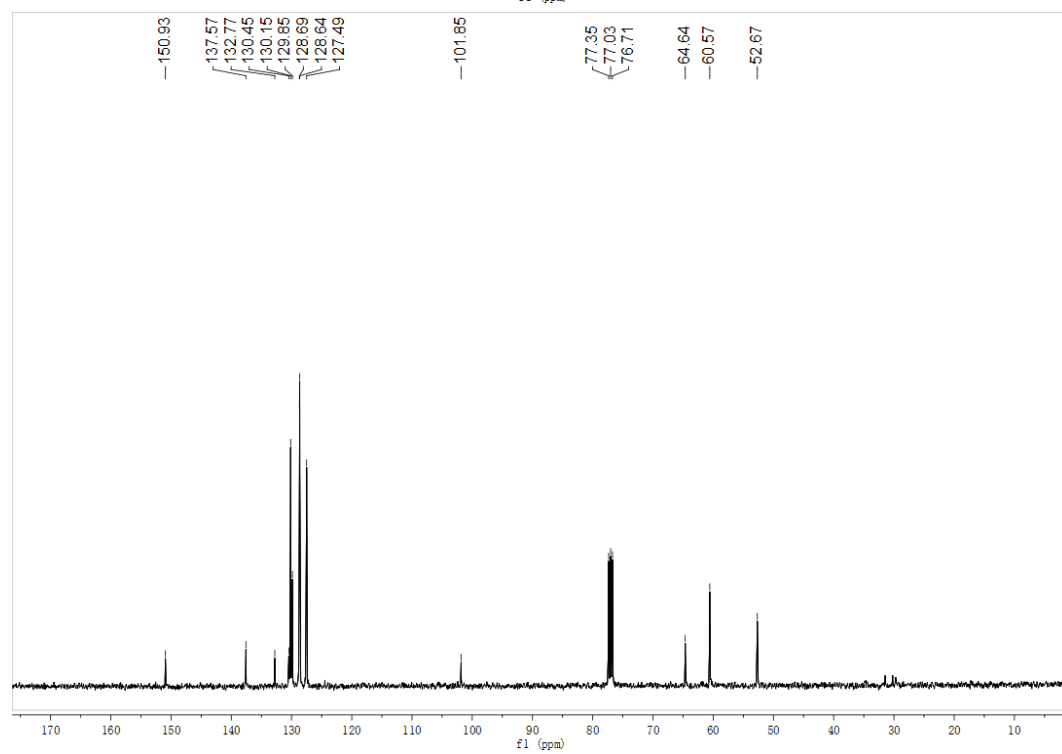

**5,5-dibromo-6-methoxy-6-phenyl-2-(p-tolyl)-5,6-dihydro-4H-1,3-oxazine (2s)**

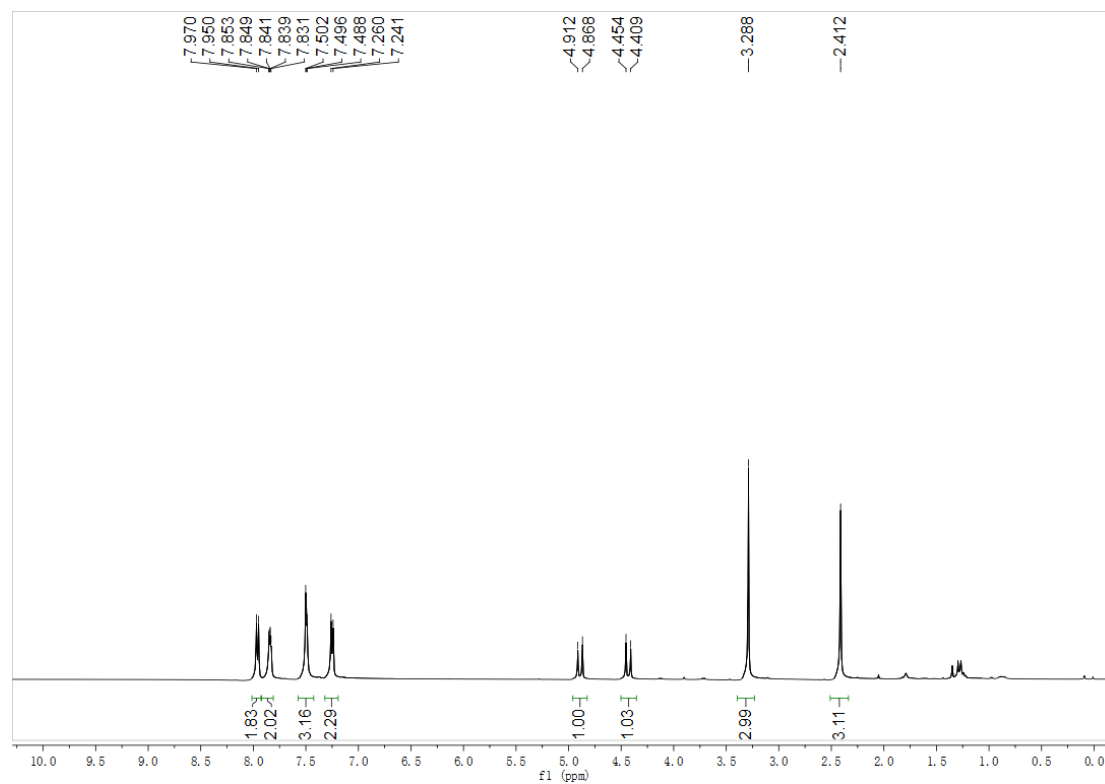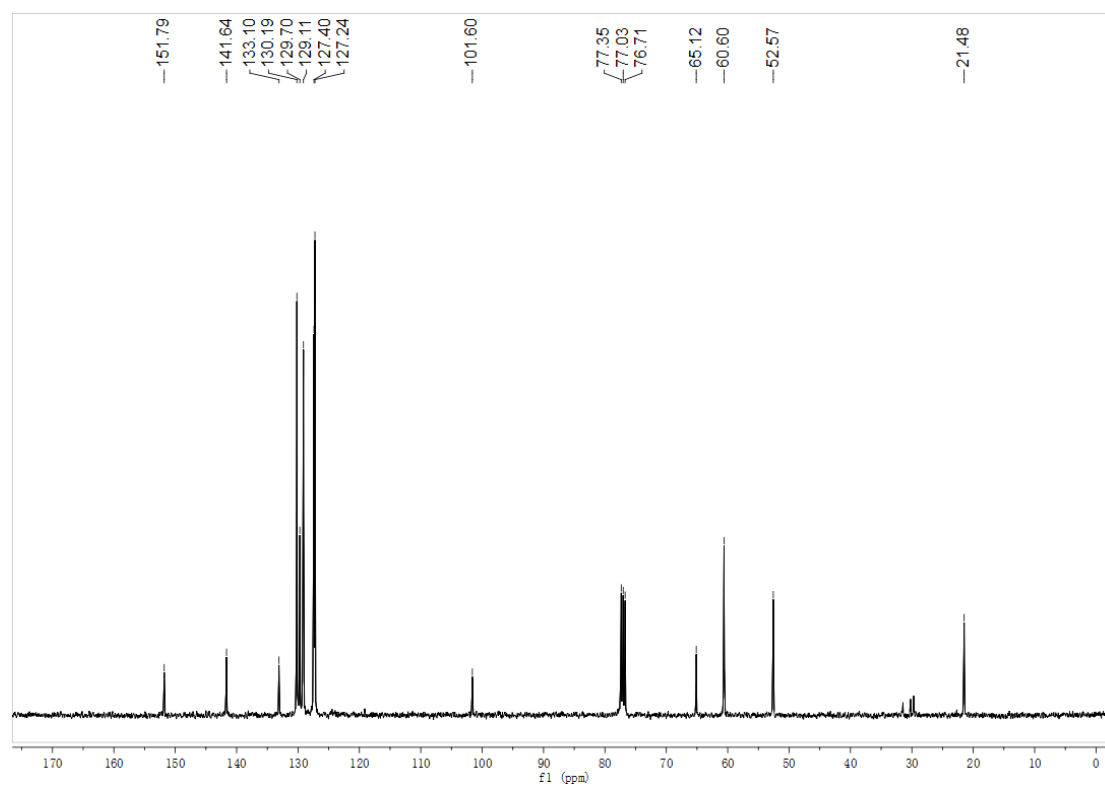

# 5,5-dibromo-2-cyclohexyl-6-methoxy-6-phenyl-5,6-dihydro-4H-1,3-oxazine (2t)

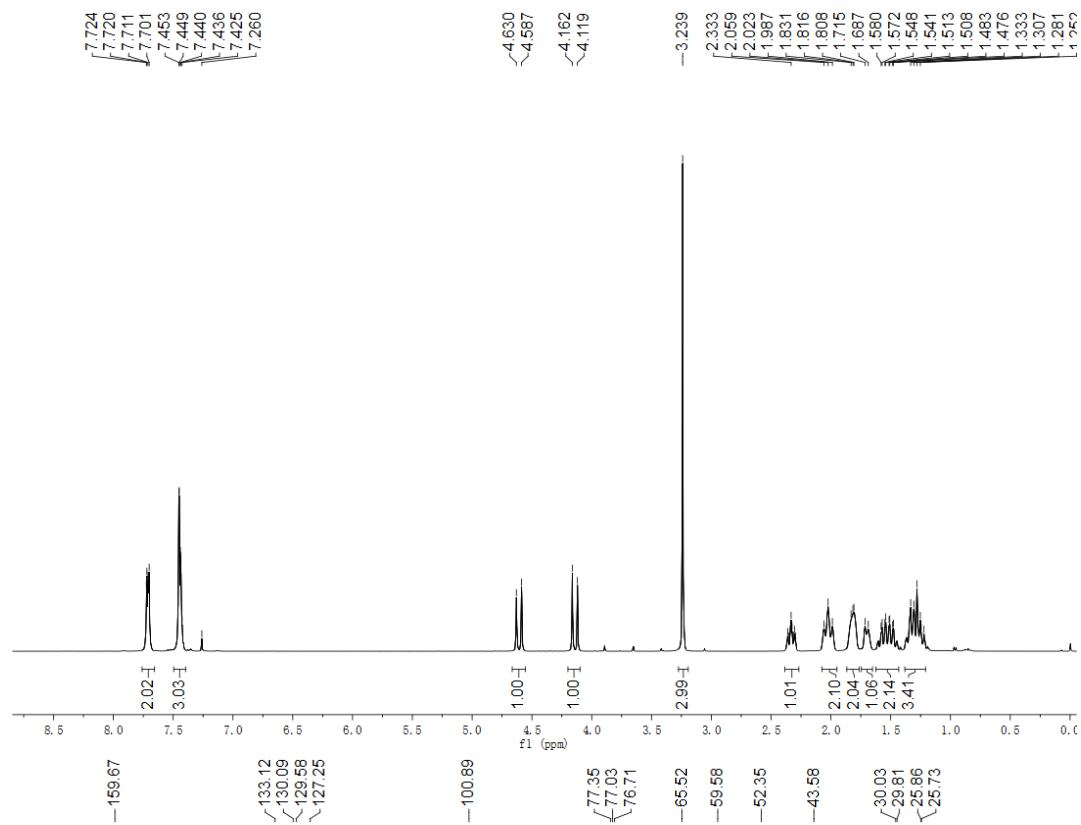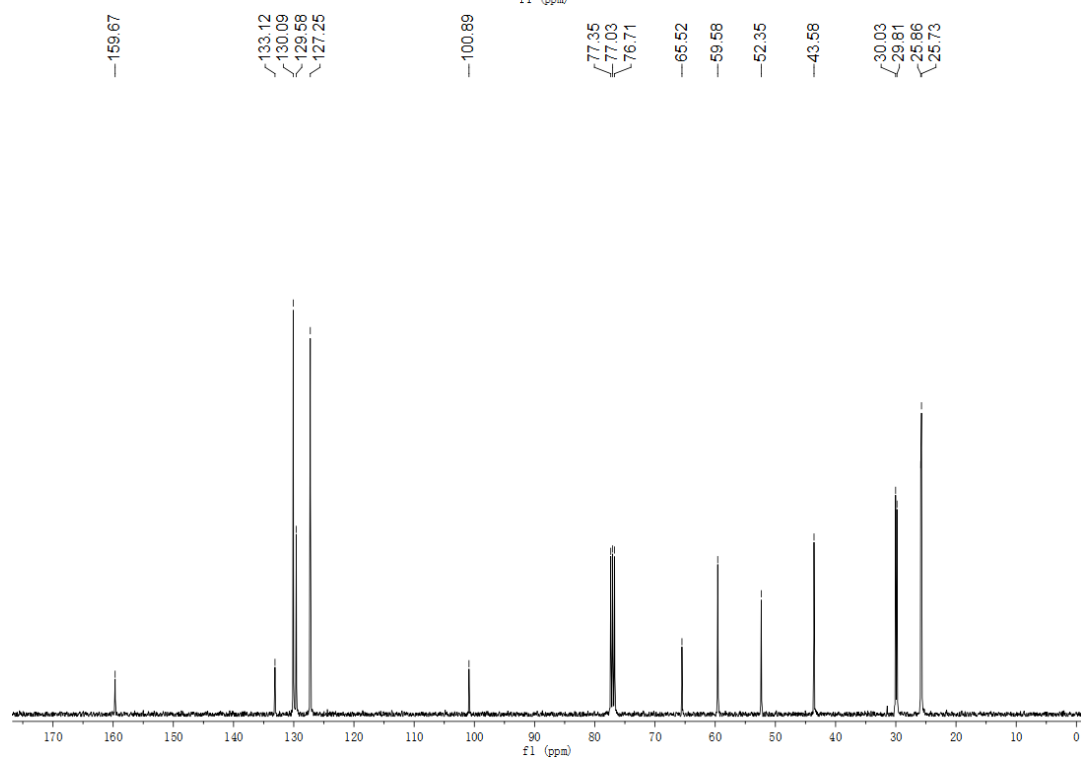



**5,5-dibromo-6-methoxy-2-phenethyl-6-phenyl-5,6-dihydro-4H-1,3-oxazine (2u)**

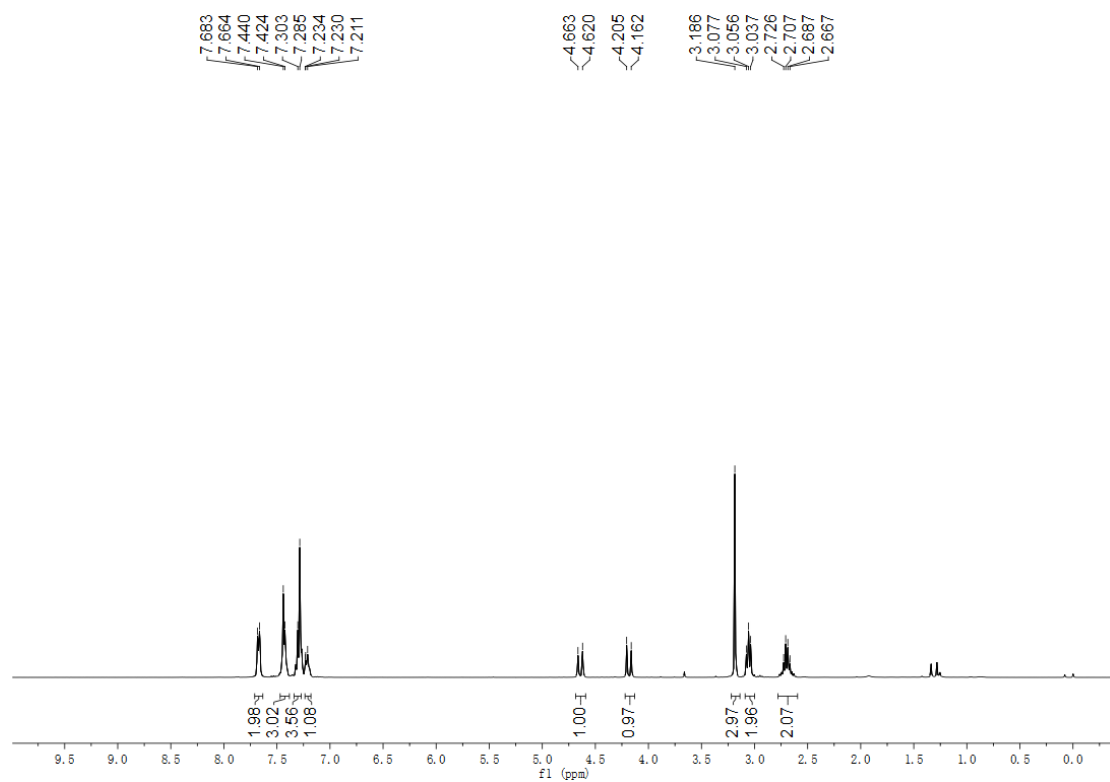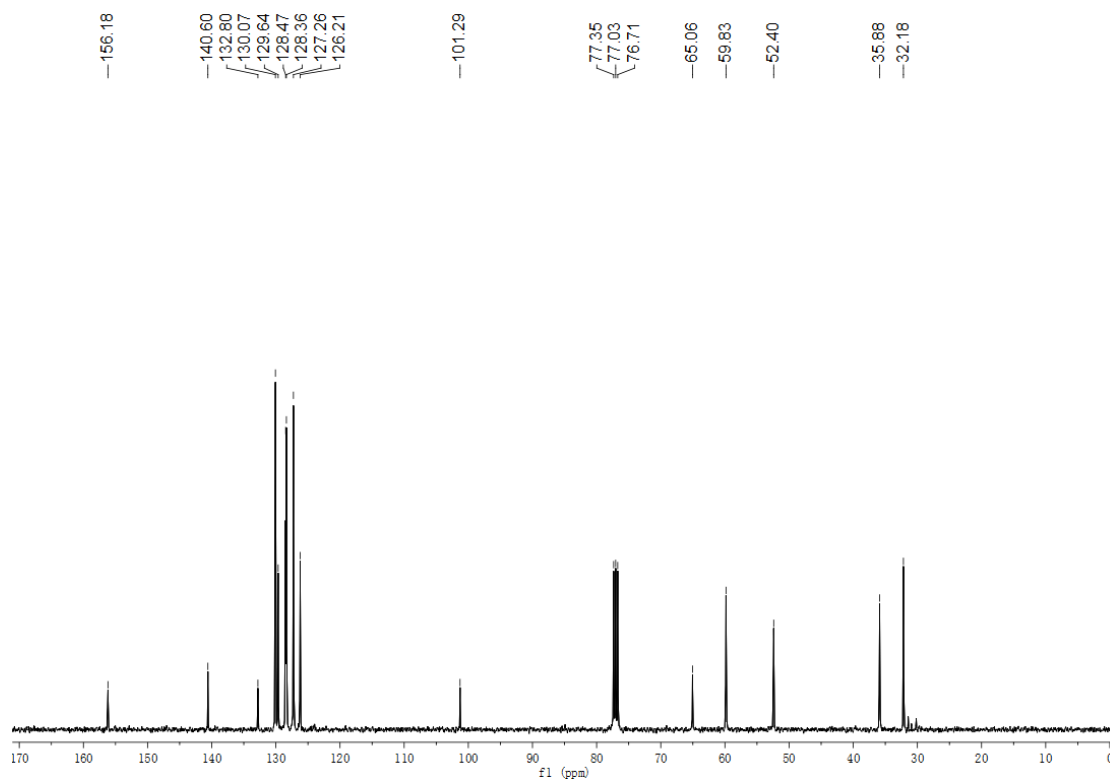

**(E)-5,5-dibromo-6-methoxy-6-phenyl-2-styryl-5,6-dihydro-4H-1,3-oxazine (2v)**

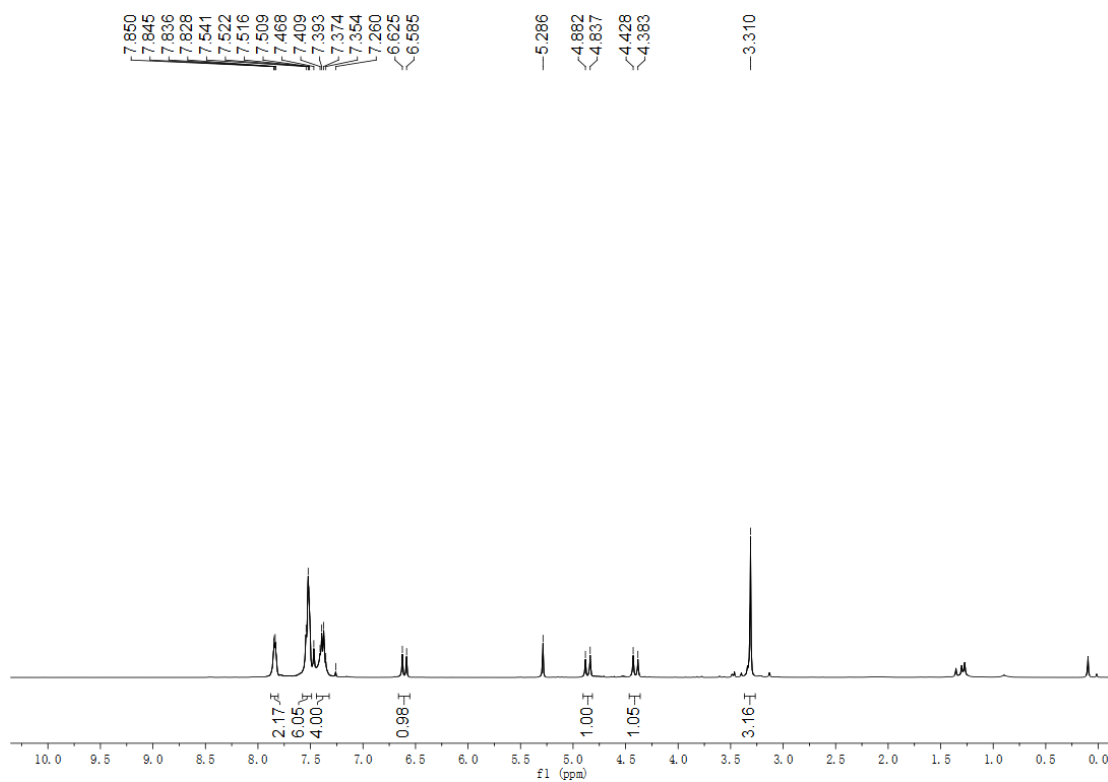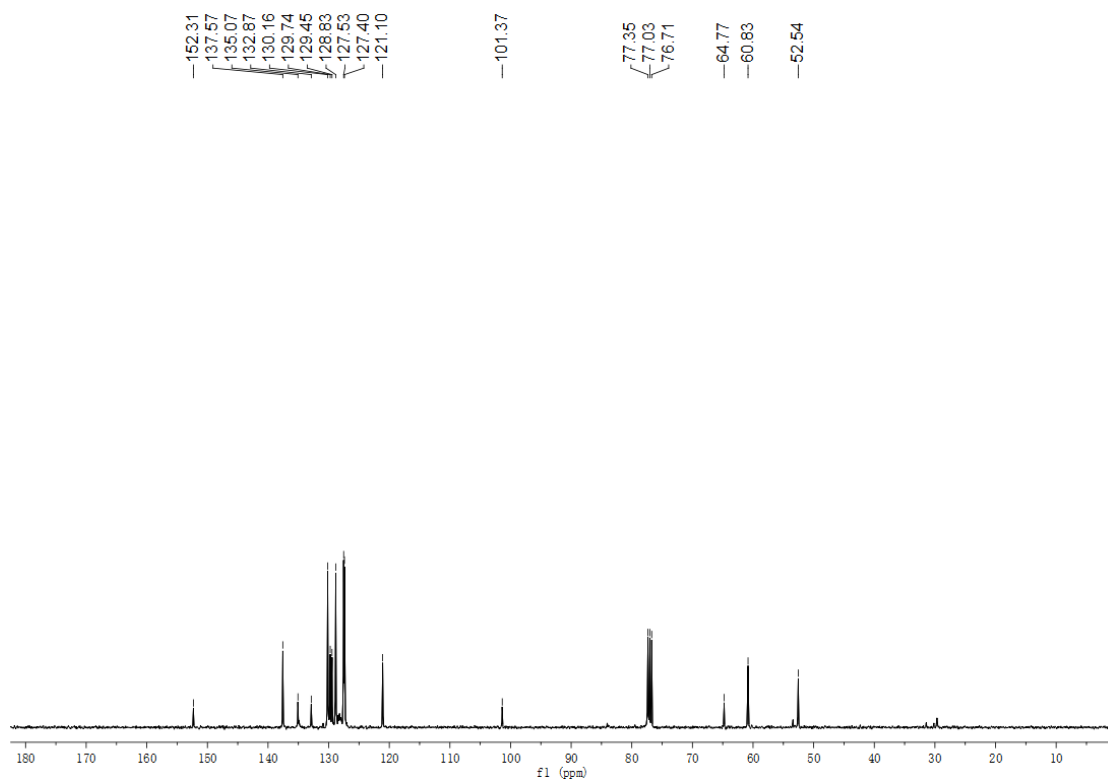

# 5,5-dibromo-6-methoxy-6-phenyl-2-(thiophen-2-yl)-5,6-dihydro-4H-1,3-oxazine

(2w)

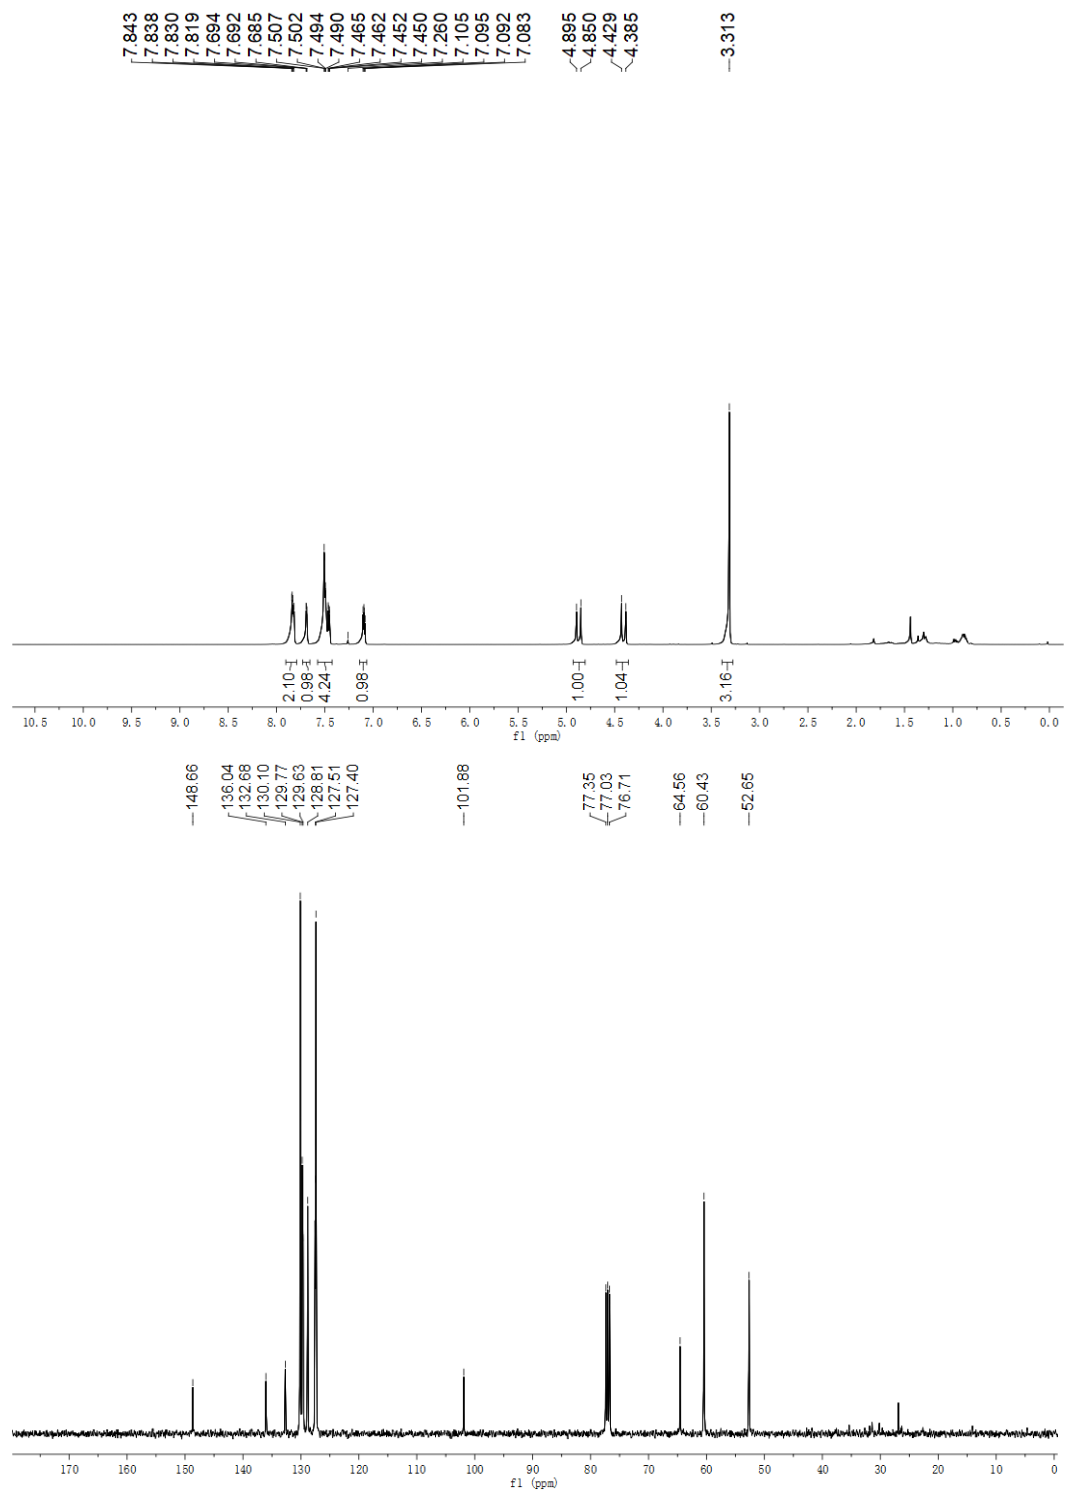

### 5,5-dibromo-6-ethoxy-2,6-diphenyl-5,6-dihydro-4H-1,3-oxazine (2x)

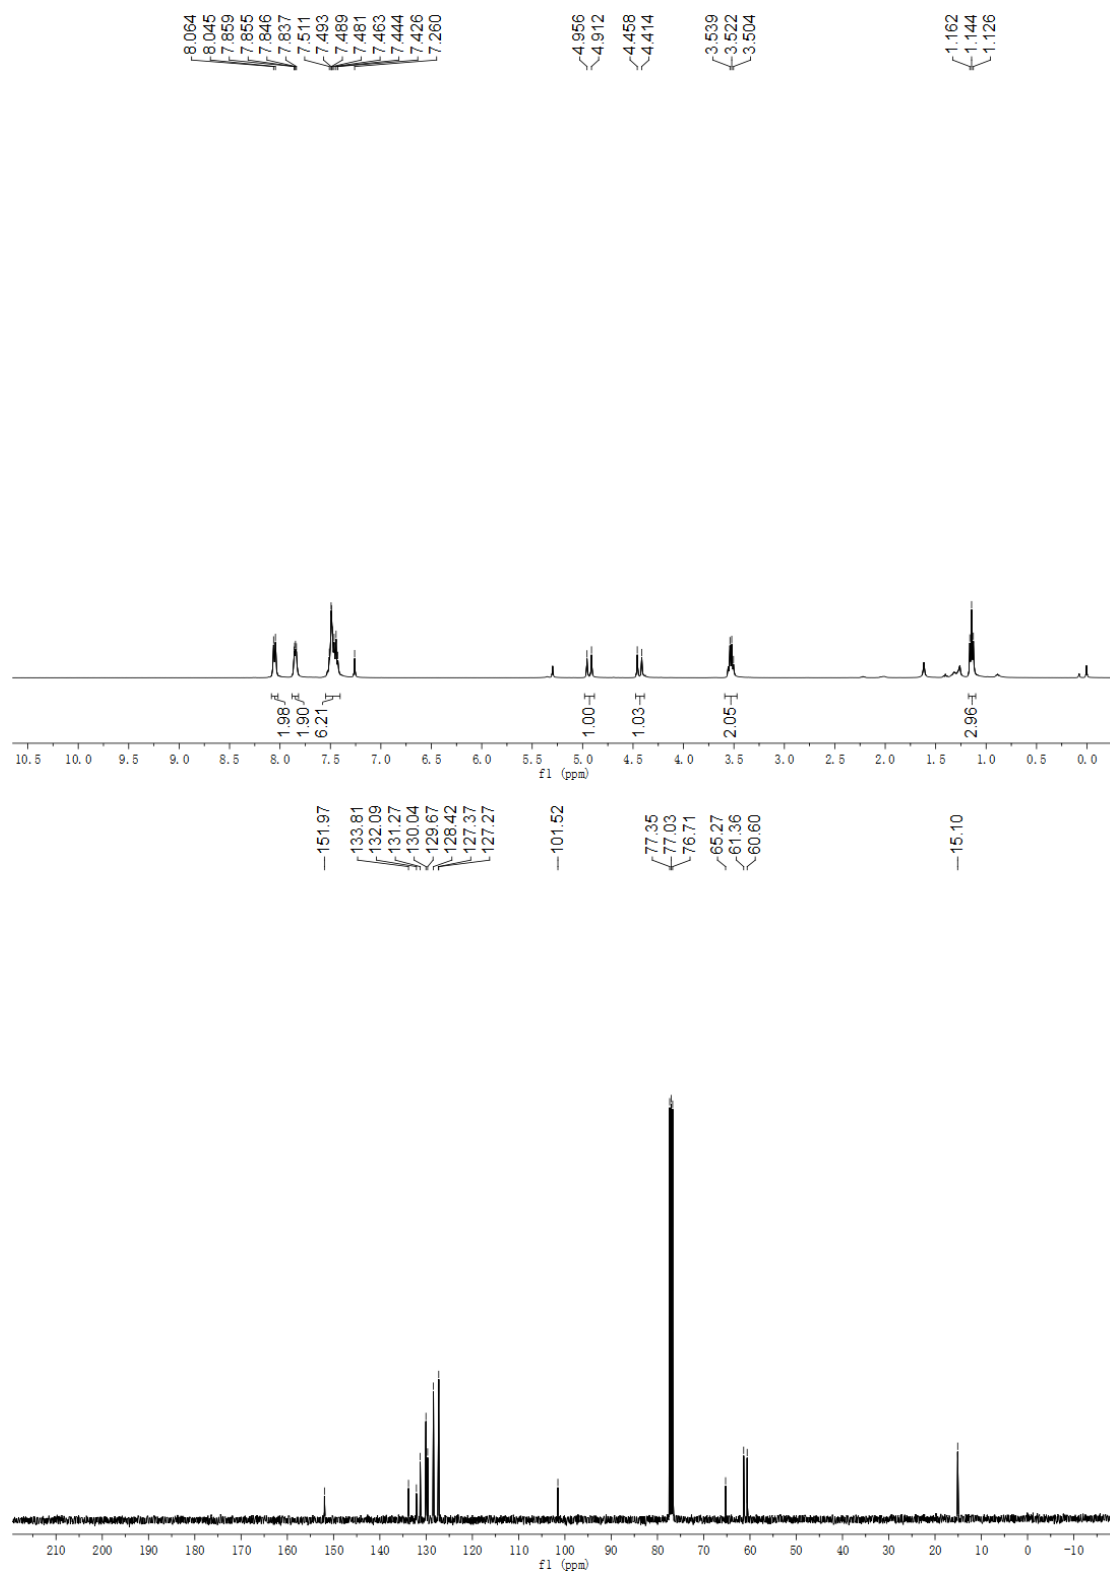

# 5,5-dibromo-6-(methoxy-d3)-6-(4-methoxyphenyl)-2-phenyl-5,6-dihydro-4H-1,3

## -oxazine (2y)

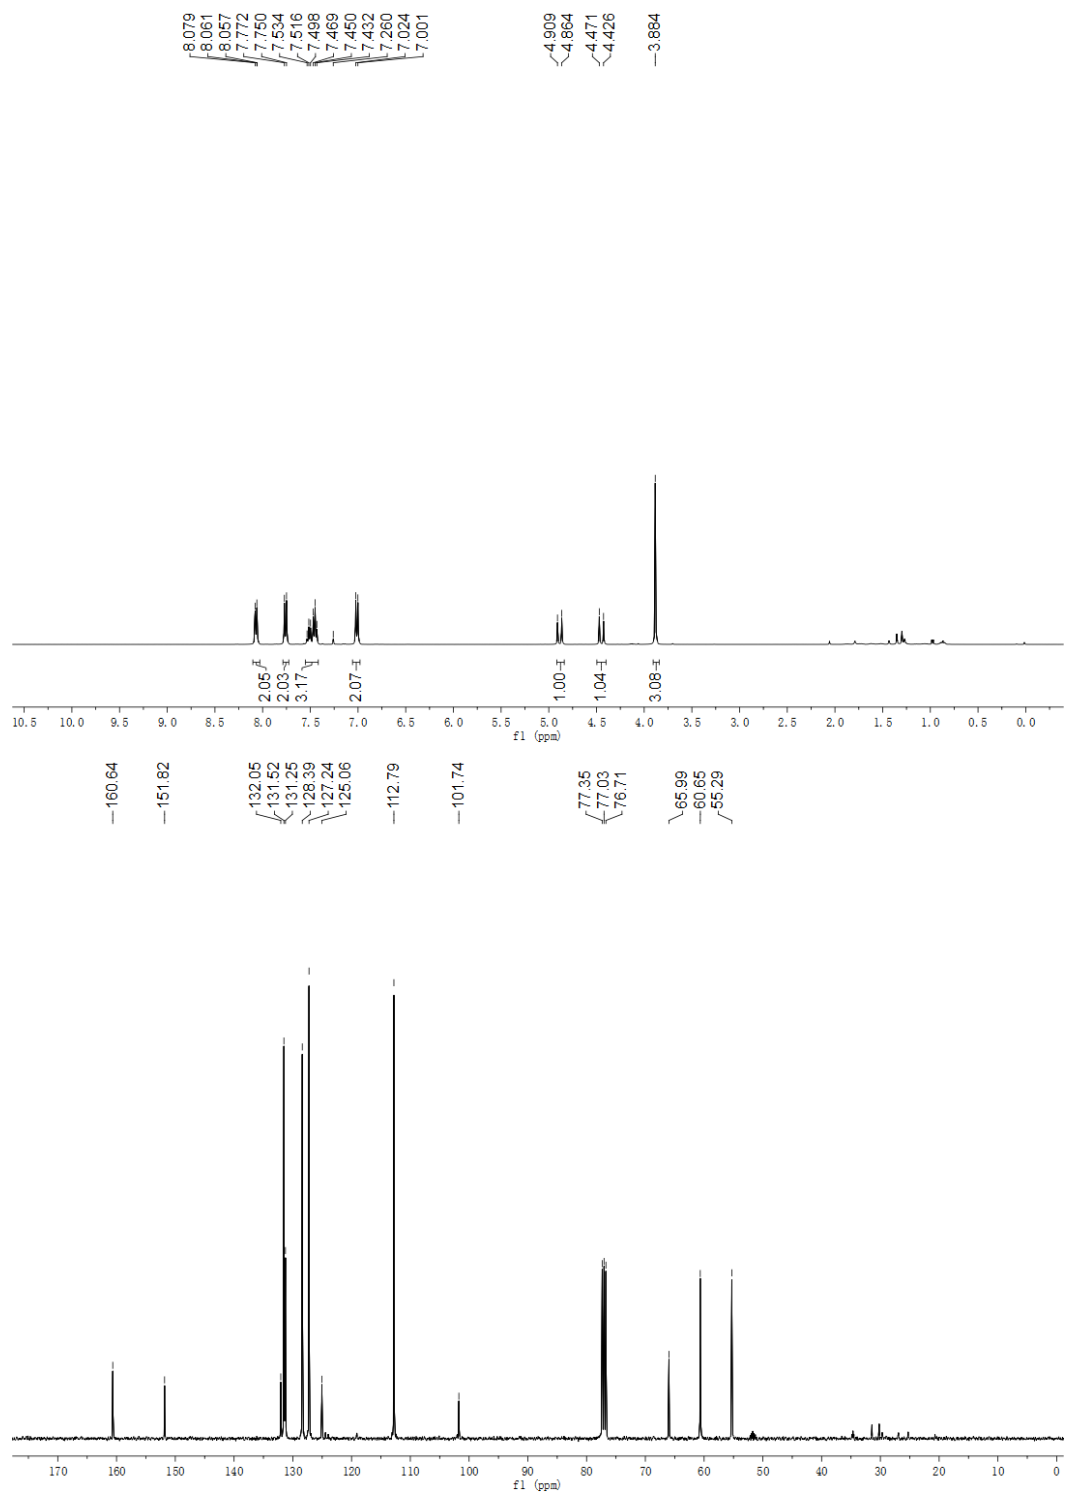

### 5-bromo-2,6-diphenyl-4H-1,3-oxazine (2a')

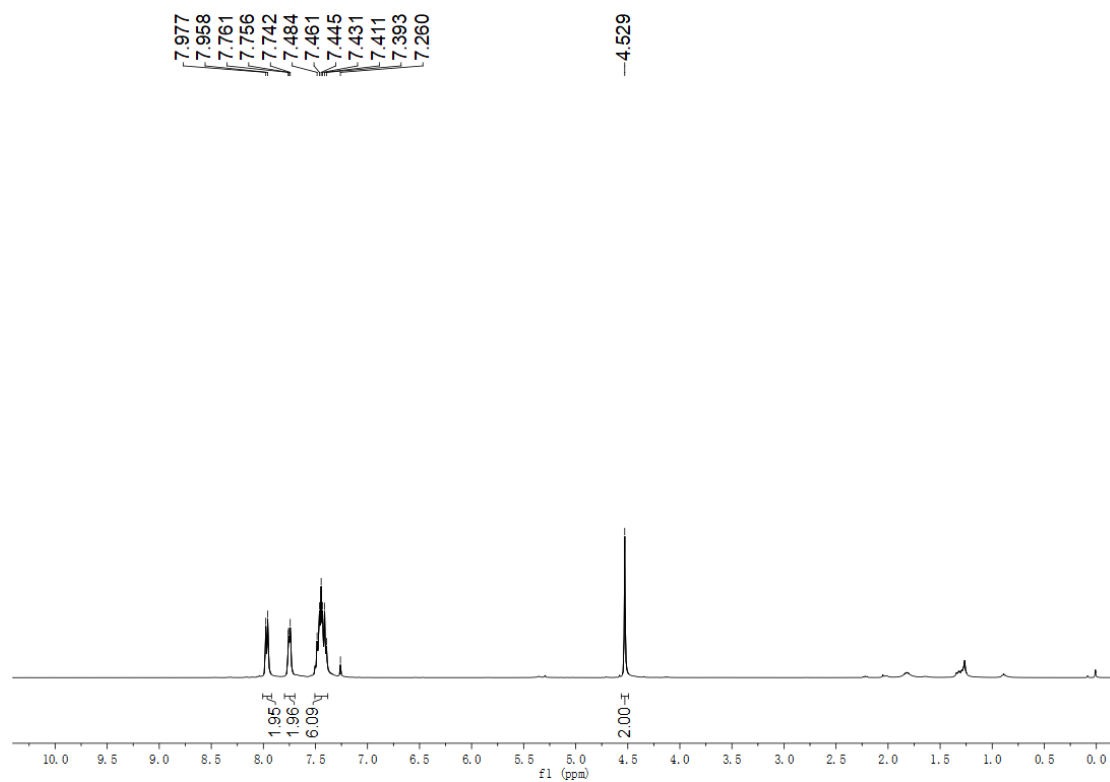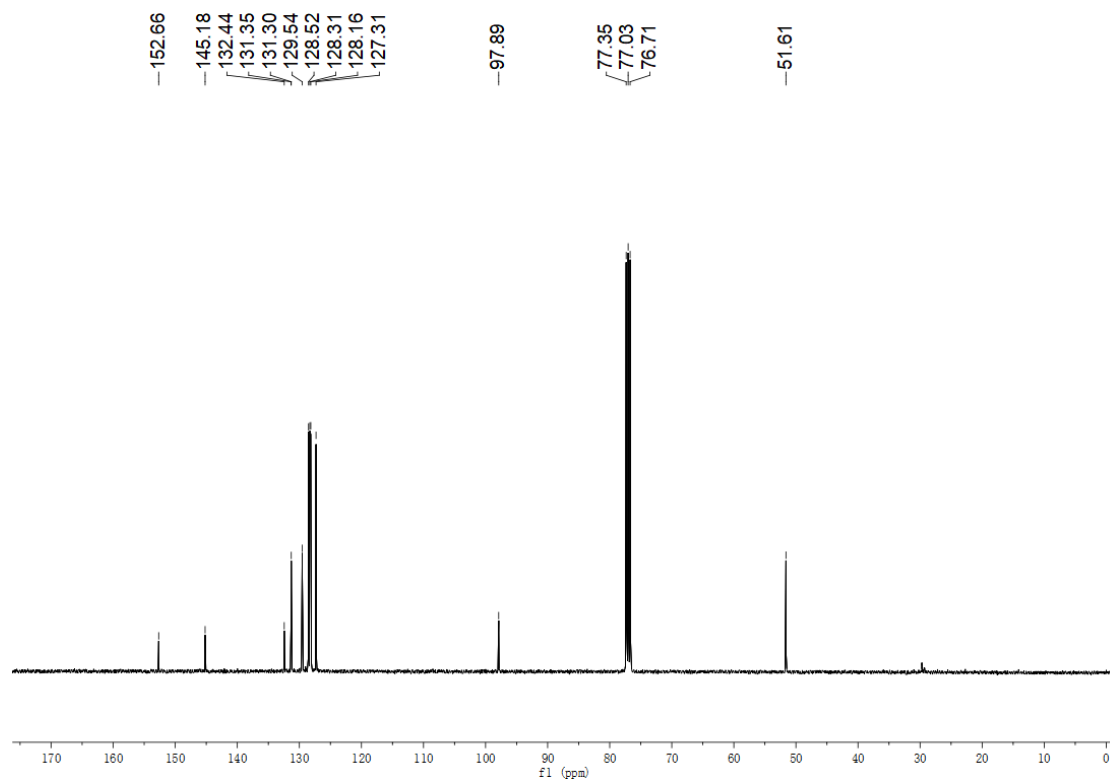

Supplement: d3ob00623a1.pdf [file d3ob00623a1.pdf]
